1 **Regulation of poplar isoprenoid biosynthesis by methylerythritol**  
2 **phosphate and mevalonic acid pathways interactions**

3

4 Ali Movahedi<sup>1</sup>, Hui Wei<sup>1,†</sup>, Boas Pucker<sup>2,†</sup>, Weibo Sun<sup>1</sup>, Dawei Li<sup>1</sup>, Liming Yang<sup>1,\*</sup>, and Qiang  
5 Zhuge<sup>1,\*</sup>

6

7 <sup>1</sup> Co-Innovation Center for Sustainable Forestry in Southern China, Key Laboratory of Forest  
8 Genetics & Biotechnology, Ministry of Education, College of Biology and the Environment,  
9 Nanjing Forestry University, Nanjing 210037, China; ali\_movahedi@njfu.edu.cn (A.M.);  
10 15850682752@163.com (H.W.); czswb@njfu.edu.cn (W.S.); dwli@njfu.edu.cn (D.L.);  
11 yangliming@njfu.edu.cn (L.Y.); qzhuge@njfu.edu.cn (Q.Z.)

12 <sup>2</sup> Institute of Plant Biology, TU Braunschweig, Braunschweig, Germany; b.pucker@tu-  
13 braunschweig.de (B.P.)

14

15

16 \* Correspondence: qzhuge@njfu.edu.cn; yangliming@njfu.edu.cn; Fax: +86-25-8542-8701

17

18 † These authors contributed equally.

19

20

21

22

23

24

25

26

27

28

29

30

31

32 **Summary**

33 Plants use two distinct isoprenoid biosynthesis routes: methylerythritol phosphate (MEP) and  
34 mevalonic acid (MVA) pathways. The rate-limiting enzymes of the MEP pathway are 1-deoxy-  
35 D-xylulose5-phosphate synthase (DXS) and 1-deoxy-D-xylulose5-phosphate reductoisomerase  
36 (DXR). 3-hydroxy-3-methylglutaryl-CoA reductase (HMGR) catalyzes the rate-limiting step in  
37 the MVA pathway. Previously, overexpression of *Populus trichocarpa* *PtDXR* was found to  
38 upregulate resistance against salt and drought stresses. We showed  
39 while *PtHMGR* overexpressors (OEs) exhibited different MEP- and MVA-related gene  
40 expressions than non-transgenic poplars (NT), the *PtDXR*-OEs revealed upregulated MEP-  
41 related and downregulated MVA-related gene expressions. *PtDXR* and *PtHMGR*  
42 overexpressions caused changes in MVA-derived trans-zeatin-riboside, isopentenyl adenosine,  
43 castasterone, and 6-deoxocastasterone well as MEP-derived carotenoids and gibberellins.  
44 In *PtHMGR*-OEs, the accumulated geranyl diphosphate synthase (*GPS*) and geranyl  
45 pyrophosphate synthase (*GPPS*) transcript levels in the MEP pathway led to an accumulation  
46 of MEP-derived isoprenoids. In contrast, upregulation of farnesyl diphosphate synthase (*FPS*)  
47 expression in the MVA pathway contributed to increased levels of MVA-derived isoprenoids.  
48 In addition, *PtHMGR*-OEs increased MEP-related *GPS* and *GPPS* transcript levels, expanded  
49 MEP-derived isoprenoid levels, changed *FPS* transcript levels, and affected MVA-derived  
50 isoprenoid yields. These results suggest that interaction exists between the MVA- and MEP-  
51 pathways.

52 **Keywords:** MEP; MVA; poplar; terpenoids; Pathway interaction

53

54

55

56

57

58

59

60

61

62

## 63 1. Introduction

64 Plants terpenoids include gibberellins (GAs), carotene, Lycopene, cytokinins (CKs),  
65 strigolactones (GRs), and brassinosteroids (BRs) are produced through methylerythritol  
66 phosphate (MEP) and mevalonic acid (MVA) pathways (Henry et al., 2015; van Schie et al.,  
67 2006; Xie et al., 2008). The mentioned pathways are involved in plant growth, development,  
68 and response to environmental changes (Bouvier et al., 2005; Kirby and Keasling, 2009). The  
69 isopentenyl diphosphate isomerase (IDI) catalyzes the conversion of the isopentenyl  
70 diphosphate (IPP) into dimethylallyl diphosphate (DMAPP), leading to provide the basic  
71 materials for all isoprenoid productions (Hemmerlin, 2012; Lu et al., 2012; Zhang et al., 2019).  
72 The produced IPP and DMAPP play essential roles in MEP and MVA pathways interactions  
73 (Huchelmann et al., 2014; Liao et al., 2016). The MVA pathway reactions appear in the  
74 cytoplasm, endoplasmic reticulum (ER), and peroxisomes (Cowan et al., 1997; Roberts, 2007),  
75 producing sesquiterpenoids and sterols. The 3-hydroxy-3-methylglutaryl-CoA reductase  
76 (HMGR), a rate-limiting enzyme in the MVA pathway, catalyzes 3-hydroxy-3-methylglutary-  
77 CoA (HMG-CoA) to form MVA (Cowan et al., 1997; Roberts, 2007).

78 Reactions of the MEP pathway occur in the chloroplast and produce carotenoids, GAs,  
79 and diterpenoids. 1-deoxy-D-xylulose5-phosphate synthase (DXS) and 1-deoxy-D-xylulose5-  
80 phosphate reductoisomerase (DXR) are rate-limiting enzymes in the MEP pathway that  
81 catalyze the conversion of D-glyceraldehyde3-phosphate (D-3-P) and pyruvate into 2-C-  
82 methyl-D-erythritol4-phosphate (MEP) (Cordoba et al., 2009; Perreca et al., 2020; Wang et al.,  
83 2012; Yamaguchi, 2018). Terpenoids like phytoalexin and volatile oils play essential roles in  
84 plant growth, development, and disease resistance (Hain et al., 1993; Ren et al., 2008).  
85 Photosynthetic pigments convert organic carbon into plant biomass (Esteban et al., 2015). In  
86 addition to an extensive range of natural functions in plants, terpenoids also consider the  
87 potential for biomedical applications. Paclitaxel is one of the most effective chemotherapy  
88 agents for cancer treatment, and artemisinin is an anti-malarial drug (Kim et al., 2016a; Kong  
89 and Tan, 2015).

90 Previous metabolic engineering studies have proposed strategies to improve the  
91 production of specific metabolites in plants (Ghirardo et al., 2014; Opitz et al., 2014). For  
92 example, PMT and H6H encoding the putrescine N-methyltransferase and hyoscyamine 6  $\beta$ -

93 hydroxylase respectively produced significantly higher scopolamine in transgenic henbane  
94 hairy root. Also, HCHL encoding p-hydroxycinnamoyl-CoA hydratase/lyase accumulated the  
95 glucose ester of p-hydroxybenzoic acid (pHBA) in *Beta vulgaris* hairy root (Rahman et al., 2009;  
96 Zhang et al., 2004). The 3-hydroxy-3-methylglutaryl-coenzyme A synthase (HMGS) is the  
97 second enzyme in the MVA pathway. Liao et al. (2018) confirmed that *HMGS* overexpression  
98 of *Brassica juncea* upregulates carotenoid and phytosterol in tomatoes. HMGR has been  
99 considered a critical factor in metabolically engineering terpenoids (Aharoni et al., 2005;  
100 Dueber et al., 2009). In addition, *PgHMGR1* overexpression of ginseng increases ginsenosides  
101 content, which is a necessary pharmaceutically active component (Kim, 2014).

102 Transgenic tobacco overexpressing the *Hevea brasiliensis* *HMGR* enhanced the  
103 phytosterol levels (Schaller et al., 1995). It has been shown (Dai et al., 2011)  
104 that *SmHMGR2* in *Salvia miltiorrhiza*, resulting in the improvement of squalene and  
105 tanshinone contents. Moreover, *Arabidopsis thaliana* *HMGR1* (*AtHMGR1*) enhanced the  
106 phytosterol levels in the first generation of transgenic tomatoes (Enfissi et al., 2005). While  
107 the deaccumulation of *DXR* transcripts resulted in lower pigmentation and chloroplast  
108 appearance defects, the upregulated *DXR* expression caused the MEP-derived plastid  
109 isoprenoids to accumulate. Therefore, *DXR* can be genetically engineered to regulate the  
110 content of terpenoids and expressed *DXR* in *Arabidopsis* and observed enhanced flux through  
111 the MEP pathway (Carretero-Paulet et al., 2006). While the *A. thaliana* *DXR* overexpression  
112 caused the diterpene anthiolimine to accumulate in *Salvia sclarea* hairy roots (Vaccaro et al.,  
113 2014), the peppermint *DXR* overexpression resulted in essential oil inflation (about 50%) with  
114 no significant variations in monoterpene composition (Mahmoud and Croteau, 2001).  
115 Furthermore, previous studies have shown the exchange of metabolic intermediates included  
116 in the MVA- and MEP-pathways through plastid membranes (Laule, 2003; Liao, 2006). In  
117 summary, the overexpression of genes involved in the MEP- and MVA-pathways can change  
118 the abundances or activities of related enzymes and metabolic products, causing a new  
119 opportunity for plant breeding to enhance the accumulation of related metabolic products.

120 Poplars as an economic and energy species are widely used in industrial and agricultural  
121 production. Its fast growth characteristics and advanced resources in artificial afforestation  
122 play a vital role in the global ecosystem (Devappa, 2015).

123 This study investigates the poplar isoprenoid biosynthesis. We showed that *PtHMGR*-

124 *OEs* upregulated MVA- and MEP-related genes in the transcript levels. *PtDXR-OEs* have also  
125 been shown involved in MVA-related genes down-regulation and MEP-related genes up-  
126 regulation, resulting in increased terpenoid collection. These results indicate that the MEP is  
127 a dominant pathway interacting with the MVA pathway and *HMGR* and *DXR* genes play key  
128 regulation points in these pathways.

## 129 **2. Results**

### 130 2.1. *Isolation of the PtHMGR and PtDXR genes and characterization of transgenic* 131 *poplars*

132 The amino acid sequence of *PtHMGR* (Potri.004G208500.1) contains domains of other  
133 HMGRs, including HMG-CoA-binding motifs (EMPVGYVQIP' and 'TTEGCLVA) and NADPH-  
134 binding motifs (DAMGMNMV' and 'VGTVGGGT) (Ma et al., 2012) (Supplemental Figure 1).  
135 Consequently, a phylogenetic tree with previously characterized HMGRs supported the  
136 *PtHMGR* candidate identification (Supplemental Figure 2). The open reading frame of  
137 the *PtHMGR* was amplified from *Populus trichocarpa* cDNA to clone in pEASY-T3 (TransGen  
138 Biotech, China) and sequencing. The putative transgenic lines showed amplicons in PCR  
139 identification compared to NT poplar (Supplemental Figure 3a). They also exhibited  
140 increased *PtHMGR-OEs* expressions than NT (Supplemental Figure 3b), indicating successful  
141 overexpression of *PtHMGR* in poplar. In addition, the *PtDXR* gene, which has been isolated,  
142 sequenced, and analyzed previously by the authors (Xu et al., 2019), was used as the *PtDXR*-  
143 *OEs* in this study.

### 144 2.2. *Effects of PtHMGR and PtDXR overexpressions on MVA- and MEP-related gene* 145 *expressions*

146 MVA-related genes *AACT*, *MVK*, and *MVD* except *HMGS* were significantly upregulated  
147 in *PtHMGR-OE* transgenics than NT poplars (Figure 1a). While the expression of MEP-related  
148 genes *DXS*, *DXR*, 1-hydroxy-2-methyl-2-(E)-butenyl-4-diphosphate synthase (*HDS*), 1-hydroxy-  
149 2-methyl-2-(E)-butenyl-4-diphosphate reductase (*HDR*), *IDI*, and *GPPS* were significantly  
150 promoted in all *PtHMGR-OEs* transgenic poplars in comparing with NT,  
151 the *GPS* overexpression was enhanced only by *PtHMGR-OE3* (Figure 1b). In addition, 2-C-  
152 methyl-d-erythritol4-phosphate cytidyltransferase (*MCT*) and 4-diphosphocytidyl-2-C-  
153 methyl-D-erythritol kinase (*CMK*) have been downregulated by *PtHMGR-OEs* (Figure 1b).

154 Moreover, while only *FPS* revealed significant upregulation by *PtDXR-OEs* in transgenics  
155 comparing with NT, the other MVA-related genes *AACT*, *HMGS*, *HMGR*, and *MVK* were  
156 considerably downregulated (Figure 1c). Finally, all MEP-related genes revealed significant  
157 upregulation in *PtDXR-OEs* transgenic poplars (Figure 1d). *GPPS* and *HDS* genes exposed more  
158 expressions induced by *DXR-OEs* than the other MEP-related genes (Figure 1d).

### 159 2.3. *PtHMGR overexpression influences the production of MVA and MEP derivatives*

160  $\beta$ -carotene is a carotenoid synthesis that has been broadly used in the industrial  
161 composition of pharmaceuticals and as food colorants, animal supplies additives, and  
162 nutraceuticals. MVA-and MEP-pathways have been proved that are effective in the  
163 biosynthesis of  $\beta$ -carotene (Yang, 2014). In addition, Lycopene is a carotenoid referring to C40  
164 terpenoids and is broadly found in various plants, particularly vegetables and fruits. It has  
165 been shown that MVA and MEP-pathways directly influence the biosynthesis production of  
166 Lycopene (Kim et al., 2019; Wei et al., 2018). While Wille et al. (2004) showed that  $\beta$ -carotene  
167 and Lutein are synthesized using intermediates from the MEP pathway, Opitz et al. (2014)  
168 revealed that both MVA and MPE pathways contribute to producing isoprenoids such as  $\beta$ -  
169 carotene and Lutein. HPLC-MS/MS has analyzed the quantity of MVA and MEP derivatives.  
170 Our analyses revealed that *HMGR-OEs* caused a significant enhancement in Lycopene (an  
171 average of ~ 0.08 ug/g),  $\beta$ -carotene (an average of ~ 0.33 ug/g), and Lutein (an average of ~  
172 272 ug/g) production compared with NT poplars (~0.02, ~0.08, and ~100 ug/g respectively)  
173 (Figure 2a, b, and c; Supplementary Figure 4). The ABA-related gene expressions also have  
174 been calculated. Results revealed significant increased of *ZEP1*, 2, and 3 relative gene  
175 expressions with the averages of ~2.85, ~4.67, and ~2.92 compared to NT with an average of  
176 ~1 (Figure 2d). These results also shown meaningful enhancements of *NCED1*, 2, and 3  
177 relative gene expressions with the averages of ~4.16, ~3.79, and ~3.4 compared to NT with an  
178 average of ~1 (Figure 2e).

### 179 2.4. *Enhanced carotenoid levels in PtDXR-OE poplars*

180 The levels of the MEP-derived substances lycopene,  $\beta$ -carotene, and Lutein were  
181 significantly increased in *PtDXR-OEs* with the averages of ~0.08, 0.22, 209.32 ug/g,  
182 respectively compared to NT poplars (Figure 3a, b, and c; Supplemental figure 5). The analyses

183 of ABA-related gene expressions revealed significantly increased *ZEP1*, 2, and 3 relative gene  
184 expressions with the averages of  $\sim 2.63$ ,  $\sim 2.38$ , and  $\sim 3.86$  compared to NT with an average of  
185  $\sim 1$  (Figure 3d). These results also showed meaningful enhancements of *NCED2* and 3 relative  
186 gene expressions with averages of  $\sim 2.25$  and  $\sim 2.21$  compared to NT with an average of  $\sim 1$   
187 (Figure 2e). These results revealed a decreased average in *NCED1* relative gene expression  
188 with an average of  $\sim 0.66$  compared to NT poplars.

## 189 2.5. *Other MVA and MEP derivatives*

190 The other MVA and MEP derivatives such as GAs, trans-zeatin-riboside (tZR), isopentenyl  
191 adenosine (IPA), 6-deoxyocastasterone (DCS), and castasterone (CS) productions affected  
192 by *PtHMGR*- and *PtDXR*-OEs have been analyzed. While Gibberellic acid (GA3) (a downstream  
193 product of MEP) ( an average of  $\sim 0.22$  ng/g), tZR (an average of  $\sim 0.06$  ng/g), IPA (an average  
194 of  $\sim 0.59$  ng/g), DCS (an average of  $4.95$  ng/g) revealed significantly more productions induced  
195 by *HMGR*-OEs, the CS production ( $\sim 0.095$  ng/g) was decreased considerably compared to NT  
196 poplars ( $\sim 0.10$ ,  $\sim 0.03$ ,  $\sim 0.37$ ,  $\sim 1.50$ , and  $\sim 0.20$  ng/g respectively) (Figure 4a-j). These results  
197 demonstrate that the *HMGR* gene interacts with MVA and MEP derivatives productions in  
198 plants. On the other hand, the *PtDXR* overexpression significantly affected the contents of  
199 MEP- and MVA-derived products except for CS. *PtDXR*-OEs showed a significant increase  
200  $\sim 0.276$  ng/g in the GA3 content (Figure 4a and f). The tZR content represented a 10-fold  
201 increase ( $\sim 0.304$  ng/g) affected by *PtDXR*-OEs compared to NT poplars ( $0.032$  ng/g) (Figure 4b  
202 and g). The content of IPA in *PtDXR*-OEs meaningfully increased  $\sim 0.928$  ng/g, compared to  
203  $0.363$  ng/g in NT poplars (Figure 4c and h) with a 3-fold increase. In addition, the DCS content  
204 considerably increased to  $\sim 3.36$  ng/g, comparing with  $\sim 1.50$  ng/g in NT, representing a 3-fold  
205 increase in *PtDXR*-OEs (Figure 4d and i). By contrast, the content of CS in *PtDXR*-OEs  
206 significantly decreased ( $\sim 0.137$  ng/g) compared to NT poplar ( $0.203$  ng/g), indicating  
207 significant down-regulation in *PtDXR*-OEs (Figure 4e and j). The HPLC-MS/MS chromatograms  
208 of GA, tZR, IPA, DCS, and CS standards are provided in Supplemental Figures 6–10.

## 209 2.6. *Phenotypic properties*

210 To figure out the effect of MVA-and MEP-pathway interactions and their changes  
211 by *PtHMGR*-and *PtDXR*-OEs on plant growth and development, we decided to evaluate



212 phenotypic changes. Our results revealed a significant increase in GA3 contents in *PtDXR*-  
213 *OEs* (Figure 4a) associated with a considerable rise in cytokinin tZR (Figure 4b), resulting in  
214 significantly more development in stem length compared to *PtHMGR-OEs* and NT poplars  
215 (Figure 5a and d). Regarding increasing ABA-related genes (*ZEP* and *NCED*) in *PtHMGR*-  
216 *OEs* than *PtDXR-OEs* and NT poplars (Figure 5b) and also concerning insufficient increase  
217 cytokinin tZR in *PtHMGR-OEs* comparing with NT poplars (Figure 4b), *PtHMGR* transgenics  
218 showed a shorter stem length than *PtDXR* transgenics compared with NT poplars (Figure 5d).  
219 We also figured out that only *PtDXR-OEs* revealed a few significant increases in stem diameters  
220 than *PtHMGR-OEs* and NT poplars (Figure 5c and d).

### 221 3. Discussion

#### 222 3.1. Characterization and evolutionary history of *HMGR*

223 Expression domains of *HMGR1* and *HMGR2* indicate a subfunctionalization. The  
224 expression of *CaHMGR1* is temporary and tissue-specific, whereas that of *CaHMGR2* is  
225 constitutive. *CaHMGR1* is only expressed in fruit tissues (pulp, endosperm, endocarp), flower  
226 buds, and leaves during the initial developing steps. In contrast, *CaHMGR2* is expressed in all  
227 tissues (flower buds, leaves, branches, and roots) and fruit tissues at various developing steps  
228 (Tiski et al., 2011). *LcHMGR1* is most highly expressed during the early stages of fruit  
229 development and regulates fruit size. The expression level of *LcHMGR1* is higher, and  
230 expression lasts longer in larger fruits. *LcHMGR2* shows an expression peak during the late  
231 stages of fruit development and is related to the biosynthesis of isoprenoid substances  
232 required for cell elongation during that time (Rui et al., 2012). Previous studies have shown  
233 that *NtHMGR2* is a stress-responsive gene (Hemmerlin et al., 2004; Merret et al., 2007). In  
234 this study, high similarity of *PtHMGR* with other known *HMGR1* was observed.  
235 Because *HMGR* is a conserved gene with a vital function in the MVA pathway, it can be used  
236 as a reference gene to determine relationships among species.

#### 237 3.2. *HMGR* overexpression results in upregulation of isoprenoid biosynthesis gene 238 expression

239 Liao et al. (2018) showed that overexpression of *BjHMGS1* affects the expression levels  
240 of MEP- and MVA-related genes and slightly increases the transcript levels of *DXS* and *DXR* in



241 transgenic plants. However, *DXS*, *DXR*, *HDS*, and *HDR* expression levels have been  
242 improved significantly in *PtHMGR-OE* poplars, while *MCT* and *CMK* are downregulated.

243 Similar to Liao et al. (2018) which the *BjHMGS1* overexpression in tomatoes significantly  
244 increased the *GPS* and *GPPS* expressions, we exhibited that the *PtHMGR* overexpression  
245 enhanced the farnesyl diphosphate synthase (*FPS*), *GPS*, and *GPPS* expressions may  
246 stimulate the interaction between IPP and DMAPP, increasing the biosynthesis of plastidial  
247 C15 and C20 isoprenoid precursors. Xu et al. (2012) showed that *HMGR* overexpression  
248 in *Ganoderma lucidum* caused upregulated *FPS*, squalene synthase (*SQS*), or lanosterol  
249 synthase (*LS*) mRNA expressions and developed the contents of ganoderic acid and  
250 intermediates, including squalene and lanosterol. In addition, the *BjHMGS1* overexpression in  
251 tomatoes significantly increased transcript levels of *FPS*, *SQS*, squalene epoxidase (*SQE*), and  
252 cycloartenol synthase (*CAS*) (Liao et al., 2018). This study exhibited that except  
253 for *HMGS* downregulating, the *AACT*, *MVK*, and *MVD* transcript levels were significantly  
254 upregulated in *PtHMGR-OE* poplars. We revealed that these enhanced gene expressions  
255 mainly were associated with the MVA-related genes contributing to the biosynthesis of  
256 sesquiterpenes and other C15 and universal C20 isoprenoid precursors.

### 257 3.3. Overexpression of *PtDXR* affects MEP- and MVA-related genes

258 Zhang et al. (2018) showed that the *TwDXR* overexpression in *Tripterygium wilfordii*  
259 increases the *TwHMGS*, *TwHMGR*, *TwFPS*, and *TwGPPS* expressions but decreases the *TwDXS*  
260 expression. Moreover, Zhang et al. (2015) exhibited that the *NtDXR1* overexpression in  
261 tobacco increases the transcript levels of eight MEP-related genes, indicating that the *NtDXR1*  
262 overexpression led to upregulated MEP-related gene expressions. In *A. thaliana*, the *DXR*  
263 transcript level changes do not affect *DXS* gene expression or enzyme accumulation, although  
264 the *DXR* overexpression promotes MEP-derived isoprenoids such as carotenoids, chlorophylls,  
265 and taxadiene (Carretero-Paulet et al., 2006).

266 On the other hand, the potato *DXS* overexpression in *A. thaliana* led to upregulation of  
267 downstream *GGPPS* and phytoene synthase (*PSY*) genes (Henriquez et al., 2016). Furthermore,  
268 (Simpson et al., 2016) exhibited that the *A. thaliana DXS* overexpression in *Daucus carota*  
269 caused to enhance the *PSY* expression significantly.

270 In this study, while the *PtDXR-OEs* exposed higher MEP-related gene expressions than NT

271 poplars, the *PtDXR-OEs* revealed significant downregulated MVA-related gene expressions  
272 than NT poplars. These findings illustrate that the MEP pathway regulates monoterpenes,  
273 diterpenes, and tetraterpenoids biosynthesis and could affect the MVA pathway.

274 The diversity of biosynthetic pathways, the complexity of metabolic networks, and the  
275 insufficient knowledge of gene regulation led to species-specific regulation patterns of MEP-  
276 and MVA-related gene expression. One possible conclusion is that MEP- and MVA-related  
277 genes often do not work alone but are co-expressed with upstream and downstream genes in  
278 the MEP- and MVA- pathways to carry out a specific function.

#### 279 3.4. *Overexpression of HMGR promotes the formation of GAs, and carotenoids in* 280 *plastids and accumulation of tZR, IPA, and DCS in the cytoplasm*

281 HMGR, as the rate-limiting enzyme in the MVA-pathway of plants, plays a critical role in  
282 controlling the flow of carbon within this metabolic pathway. The upregulation  
283 of *HMGR* significantly increases isoprenoid levels in plants. Overexpression of *HMGRs* of  
284 different plant species has been reported to raise isoprenoids levels significantly. The  
285 heterologous expression of *Hevea brasiliensis HMGR1* in tobacco increased the sterol content  
286 and accumulated intermediate metabolites (Schaller et al., 1995). The *A. thaliana HMGR*  
287 overexpression in *Lavandula latifolia* increased the levels of sterols in the MVA- and MEP-  
288 derived monoterpenes and sesquiterpenes (Munoz-Bertomeu et al., 2007). In addition,  
289 the *Salvia miltiorrhiza SmHMGR* overexpression in hairy roots developed MEP-derived  
290 diterpene tanshinone (Kai et al., 2011). In our study, ABA synthesis-related genes  
291 (*NCED1*, *NCED3*, *NCED6*, *ZEP1*, *ZEP2*, and *ZEP3*) and the contents of GA3 and carotenoids  
292 were upregulated in *PtHMGR-OE* poplar seedlings. This finding suggests that  
293 the *HMGR* overexpression may indirectly affect the biosynthesis of MEP-related isoprenoids,  
294 including GA3 and carotenoids. The accumulation of MVA-derived isoprenoids including tZR,  
295 IPA, and DCS was significantly elevated in *PtHMGR-OEs*, indicating  
296 that *PtHMGR* overexpression directly influences the biosynthesis of MVA-related isoprenoids.  
297 Therefore, the *HMGR* gene directly affects MVA-derived isoprenoids and indirectly affects the  
298 content of MEP-derived isoprenoids by changing the expression levels of MEP-related genes.

#### 299 3.5. *Higher levels of MEP- and MVA-derived products in PtDXR-OE seedlings*

300 DXR is the rate-limiting enzyme in the MEP pathway and an essential regulatory step in

301 the cytoplasmic metabolism of isoprenoid compounds (Takahashi et al., 1998). Mahmoud and  
302 Croteau (2001) revealed that overexpression of *DXR* in *Mentha piperita* promoted the  
303 synthesis of monoterpenes in the oil glands and increased the production of essential oil yield  
304 by 50%. However, the up-regulation of *DXR* expression did not lead to change in the complex  
305 oil composition significantly. Hasunuma et al. (2008) exhibited that overexpression of  
306 *Synechocystis sp.* strain PCC6803 *DXR* in tobacco resulted in increased levels of  $\beta$ -carotene,  
307 chlorophyll, antheraxanthin, and Lutein. Xing et al. (2010) showed that the *A. thaliana dxr*  
308 mutants caused to lack of GAs, ABA, and photosynthetic pigments (REF57). These mutants  
309 showed pale sepals and yellow inflorescences (Xing et al., 2010). In our study, the relatively  
310 higher abundance of GA3 and carotenoids in *PtDXR-OE* poplar seedlings indicated an effect of  
311 *DXR* overexpression. Combined with the result described above of increased *DXS*, *HDS*, *HDR*,  
312 *MCT*, *CMK*, *FPS*, *GPS*, and *GPPS* expression levels, we postulate that overexpression of *DXR* not  
313 only affects the expression levels of MEP-related genes but also changes the field of GA3, and  
314 carotenoids.

### 315 3.6. *Interaction between the MVA and MEP pathways*

316 Although the substrates of MVA- and MEP-pathways differ, there are common  
317 intermediates like IPP and DMAPP (Figure 6). Blocking only the MVA or the MEP pathway,  
318 respectively, does not entirely prevent the biosynthesis of terpenes in the cytoplasm or  
319 plastids, indicating that some MVA and MEP pathways products can be transported and/or  
320 move between cell compartments (Aharoni et al., 2003; Aharoni et al., 2004; Gutensohn et  
321 al., 2013). For example, it has been shown that the transferring IPP from the chloroplast to  
322 cytoplasm observed through <sup>13</sup>C labeling, indicating that plentiful IPP is available for use in  
323 the MVA-pathway to produce terpenoids (Ma et al., 2017). In addition, segregation between  
324 the MVA- and MEP-pathways is limited and might exchange some metabolites over the plastid  
325 membrane (Laule, 2003). Kim et al. (2016b) used clustered, regularly interspaced short  
326 palindromic repeats (CRISPR) technology to reconstruct the lycopene synthesis pathway and  
327 control the flow of carbon in the MEP-and MVA-pathways. The results showed that the  
328 expression of MVA-related genes was reduced by 81.6%, but the lycopene yield was  
329 significantly increased. By analyzing gene expression levels and metabolic outcome  
330 in *PtHMGR*-and *PtDXR-OEs*, we discovered that the correlation might exist between MVA- and

331 MEP-related genes with MVA- and MEP-derived products, which are not restricted to crosstalk  
332 between IPP and DMAPP (Figure 6).

333 On the one hand, overexpression of *PtDXR* affected the transcript levels of MEP-related  
334 genes and the contents of MEP-derived isoprenoids, including GAs and carotenoids. The  
335 diminished accumulation of MVA-related gene products causes a reduction in the yields of  
336 MVA-derived isoprenoids (including CS) but leads to increasing tZR, IPA, and DCS contents. We  
337 hypothesize that IPP and DMAPP produced by the MEP pathway could enter the cytoplasm to  
338 compensate for the lack of IPP and DMAPP, and the IPP and DMAPP as the precursors of the  
339 MVA pathway are used to guide the synthesis of MVA-derived products. On the other  
340 hand, *PtHMGR-OEs* exhibited higher transcript levels of *AACT*, *MVK*, and *MVD* and  
341 higher *DXS*, *DXR*, *HDS*, and *HDR* than NT poplars, resulting in effect both MEP- and MVA-  
342 related gene expressions. We successfully demonstrated that manipulation of *HMGR* in the  
343 poplar MVA-pathway results in dramatically enhanced yields of GAs and carotenoids. This  
344 result illustrates that cytosolic *HMGR* overexpression expanded plastidial GPP- and GGPP-  
345 derived products, such as carotenoids. Therefore, this study provides hints that crosstalk  
346 between the MVA- and MEP-pathways increased the expression levels  
347 of *GPS* and *GPPS* in *PtHMGR-OEs*, and elevated the contents of GA3 and carotenoids.  
348 Moreover, changes in MEP- and MVA-related gene expressions affect MVA- and MEP-derived  
349 isoprenoids. Identification of the molecular mechanism holding this crosstalk requires further  
350 investigation.

351 In conclusion, overexpression of *PtHMGR* in poplars caused the accumulation of MVA-  
352 derived isoprenoids and MEP-derived substances. The advanced insights into the regulation  
353 of MVA- and MEP-pathways in poplar add to the knowledge about these pathways in  
354 *Arabidopsis*, tomato, and rice. In *PtHMGR-OE* poplars, most MEP- and MVA-related genes  
355 associated with the biosynthesis of isoprenoid precursors were upregulated. In *PtDXR*-  
356 *OE* poplars, elevated contents of GAs, carotenoids, and GRs were attributed to increased  
357 expression of MEP-related genes as well as plastidial *GPP* and *GGPP*. Together, these results  
358 show that manipulating *PtDXR* and *PtHMGR* is a novel strategy to influence poplar isoprenoids.

### 359 3.7. *The impressed crosstalk between MVA- and MEP-pathways by PtHMGR-* 360 *and PtDXR-OEs influence plant growth and developments*

361 It has been shown that Abscisic acid (ABA) and GA3 perform essential functions in cell  
362 division, shoot growth, and flower induction (Xing et al., 2016). It has also been demonstrated  
363 that the cytokinin tZR, a variety of phytohormones, perform a crucial function as root to shoot  
364 signals, directing numerous developmental and growth processes in shoots (Abul et al., 2010;  
365 Sakakibara, 2006). Regarding these findings, we showed how the interactions between MVA-  
366 and MEP-pathways and their changes affected by some stimulators (*HMGR*-and *DXR-OEs*)  
367 influenced plant growth, especially in stem length. Finally, We figured out that the gibberellic  
368 acid and cytokinin may be more effective in plant growth than inhibiting by ABA, causing  
369 higher *PtDXR-OEs* than *PtHMGR-OEs* compared with NT poplars.

## 370 **4. Materials and Methods**

### 371 4.1. *Plant materials and growth conditions*

372 Non-transgenic *P. trichocarpa* and *Populus × euramericana* cv. 'Nanlin 895' plants were  
373 cultured in half-strength Murashige and Skoog (1/2 MS) medium (pH 5.8) under conditions of  
374 24°C and 74% humidity (Movahedi et al., 2015). Subsequently, NT and transgenic poplars were  
375 cultured in 1/2 MS under long-day conditions (16 h light/8 h dark) at 24°C for 1 month  
376 (Movahedi et al., 2018).

### 377 4.2. *PtHMGR and PtDXR genes isolation and vector construction*

378 To produce cDNA, total RNA was extracted from *P. trichocarpa* leaves and processed with  
379 PrimeScript™ RT Master Mix, a kind of reverse transcriptase (TaKaRa, Japan). Forward and  
380 reverse primers (Supplemental Table 1: *PtHMGR-F* and *PtHMGR-R*) were designed, and the  
381 open reading frame (ORF) of *PtHMGR* was amplified via PCR. We then used the total volume  
382 of 50µl including 2 µl primers, 2.0 µl cDNA, 5.0 µl 10 × PCR buffer (Mg<sup>2+</sup>), 4µl dNTPs (2.5 mM),  
383 0.5 µl rTaq polymerase (TaKaRa, Japan) for the following PCR reactions: 95°C for 7 min, 35  
384 cycles of 95°C for 1 min, 58°C for 1 min, 72°C for 1.5 min, and 72°C for 10 min. Subsequently,  
385 the product of the *PtHMGR* gene was ligated into the pEASY-T3 vector (TransGen Biotech,  
386 China) based on blue-white spot screening, and the *PtHMGR* gene was inserted into the vector  
387 pGWB9 (Song et al., 2016) using Gateway technology (Invitrogen, USA). On the other hand, all

388 steps to generate cDNA, RNA extraction, PCR, pEASY-T3 ligation, and vector construction  
389 (pGWB9-PtDXR) of *PtDXR* have been carried out according to Xu et al. (2019).

#### 390 4.3. *Creation of phylogenetic tree*

391 We applied the ClustalX for multiple sequence alignment of HMGR proteins, and  
392 MEGA5.0 software was used to construct a phylogenetic tree using 1000 bootstrap replicates.  
393 The amino acid sequences of HMGR from *Populus trichocarpa*, *Arabidopsis thaliana*,  
394 *Gossypium raimondii*, *Malus domestica*, *Manihot esculenta*, *Oryza sativa*, *Prunus persica*,  
395 *Theobroma cacao*, and *Zea mays* were obtained from the National Center for Biotechnology  
396 Information database (<https://www.ncbi.nlm.nih.gov/>) and Phytozome ([https://phytozome-  
397 next.jgi.doe.gov/](https://phytozome-next.jgi.doe.gov/)).

#### 398 4.4. *Transgenic poplars: generation and confirmation*

399 *Agrobacterium tumefaciens* var. EHA105 was used for the infection of poplar leaves and  
400 petioles (Movahedi et al., 2014). Poplar buds were screened on differentiation MS medium  
401 supplemented with 30 µg/mL Kanamycin (Kan). Resistant buds were planted in bud elongation  
402 MS medium containing 20 µg/mL Kan and transplanted into 1/2 MS medium including 10  
403 µg/mL Kan to generate resistant poplar trees. Genomic DNA has been extracted from putative  
404 transformants one-month-old leaves grown on a kanamycin-containing medium using  
405 TianGen kits (TianGen BioTech, China). The quality of the extracted genomic DNA (250–350  
406 ng/µl) was determined by a BioDrop spectrophotometer (UK). PCR was carried out using  
407 designed primers (Supplementary Table 1: CaMV35S as the forward and PthMGR as the  
408 reverse), Easy Taq polymerase (TransGene Biotech), and 50 ng of extracted genomic DNA as a  
409 template to amplify about 2000 bp. In addition, total RNA was extracted from these one-  
410 month-old leaves to produce cDNA, as mentioned above. These cDNA then were applied to  
411 reverse transcription-quantitative PCR (RT-qPCR) (Supplemental Table 1: PthMGR forward and  
412 reverse) for comparing the transformants *PthMGR-OEs* expressions with NT poplars and  
413 transforming confirmation.

#### 414 4.5. *Phenotypic properties evaluation*

415 To evaluate phenotypic changes, we selected 45-day-old poplars from PthMGR-and



416 PtDXR-OEs and NT poplars. We then simultaneously calculated the stem lengths (mm) and  
417 stem diameters (mm) every day and recorded them. All recorded were analyzed by GraphPad  
418 Prism 9, applying ANOVA one way (Supplemental Table 2).

#### 419 4.6. *Analyses via qRT-PCR*

420 12-month-old *PtDXR-OEs* (Xu et al., 2019) and *PtHMGR-OE* poplars (Soil-grown poplars)  
421 have been used to extract total RNA. The qRT-PCR was performed to identify MVA- and MEP-  
422 related gene expression levels in NT, *PtDXR-OE*, and *PtHMGR-OE* poplars. The qRT-PCR was  
423 served with a StepOne Plus Real-time PCR System (Applied Biosystems, USA) and SYBR Green  
424 Master Mix (Roche, Germany). Poplar *Actin* (*PtActin*) (XM-006370951.1) was previously tested  
425 as a reference gene for this experiment (Zhang et al., 2013). The following conditions were  
426 used for qRT-PCR reactions: pre-denaturation at 95°C for 10 min, 40 cycles of denaturation at  
427 95°C for 15 s, and a chain extension at 60°C for 1 min. Three independent experiments were  
428 conducted using gene-specific primers (Supplemental Table 1: PtHMGR forward and reverse).

#### 429 4.7. *Metabolite analyses via high-performance liquid chromatography-tandem* 430 *mass spectrometry*

431 The isopropanol/acetic acid extraction method extracted poplar endogenous hormones  
432 from NT, *PtDXR-OE*, and *PtHMGR-OE* leaves. GAs and CKs were extracted from, and then HPLC-  
433 MS/MS (Qtrap6500, Agilent, USA) was used to quantify levels of GAs, zeatin, tZR, and IPA. Also,  
434 methanol considered as solvent was used to extract 5-Deoxystrigol (5-DS), CS, and DCS, and  
435 HPLC-MS/MS (Agilent1290, AB; SCIEX-6500Qtrap, Agilent; USA) was also used to determine  
436 the contents of 5-DS, CS, and DCS. In addition, acetone, as a solvent, was used to isolate the  
437 carotenoid component of poplar leaves. To identify the carotenoid contents, the peak areas  
438 of carotenoids analyzed by HPLC (Symmetry Shield RP18, Waters, USA) were used to draw  
439 standard carotenoid curves, including  $\beta$ -carotene, Lycopene, and Lutein. Also, the HPLC was  
440 used to determine the contents of carotenoids, including  $\beta$ -carotene, Lycopene, and Lutein in  
441 NT and OE lines.

#### 442 **Author contributions**

443 A.M. and H.W. conceived, planned, and coordinated the project, performed data analysis,  
444 wrote the draft, and finalized the manuscript. B.P. validated and contributed to data analysis  
445 and curation, revised and finalized the manuscript. W.S. and D.L. reviewed and edited the



446 manuscript. L.Y. and Q.Z. coordinated, contributed to data curation, finalized and funded this  
447 research. A.M., H.W., and B.P. contributed equally as the first author.

#### 448 **Conflict of interest**

449 The authors declare that they have no conflict of interest.

#### 450 **Acknowledgments**

451 This work was supported by the National Key Program on Transgenic Research  
452 (2018ZX08020002), the National Science Foundation of China (No. 31570650), and the  
453 Priority Academic Program Development of Jiangsu Higher Education Institutions.

#### 454 **5. Reference**

- 455 Abul, Y., Menendez, V., Gomez-Campo, C., Revilla, M.A., Lafont, F. and Fernandez, H. (2010) Occurrence of  
456 plant growth regulators in *Psilotum nudum*. *J Plant Physiol* **167**, 1211-1213.
- 457 Aharoni, A., Giri, A.P., Deuerlein, S., Griepink, F., de Kogel, W.J., Verstappen, F.W., Verhoeven, H.A., Jongsma,  
458 M.A., Schwab, W. and Bouwmeester, H.J. (2003) Terpenoid metabolism in wild-type and transgenic  
459 *Arabidopsis* plants. *Plant Cell* **15**, 2866-2884.
- 460 Aharoni, A., Giri, A.P., Verstappen, F.W., Berteau, C.M., Sevenier, R., Sun, Z., Jongsma, M.A., Schwab, W. and  
461 Bouwmeester, H.J. (2004) Gain and loss of fruit flavor compounds produced by wild and cultivated  
462 strawberry species. *Plant Cell* **16**, 3110-3131.
- 463 Aharoni, A., Jongsma, M.A. and Bouwmeester, H.J. (2005) Volatile science? Metabolic engineering of terpenoids  
464 in plants. *Trends Plant Sci* **10**, 594-602.
- 465 Bouvier, F., Rahier, A. and Camara, B. (2005) Biogenesis, molecular regulation and function of plant isoprenoids.  
466 *Prog Lipid Res* **44**, 357-429.
- 467 Carretero-Paulet, L., Cairo, A., Botella-Pavia, P., Besumbes, O., Campos, N., Boronat, A. and Rodriguez-  
468 Concepcion, M. (2006) Enhanced flux through the methylerythritol 4-phosphate pathway in *Arabidopsis*  
469 plants overexpressing deoxyxylulose 5-phosphate reductoisomerase. *Plant Mol Biol* **62**, 683-695.
- 470 Cordoba, E., Salmi, M. and Leon, P. (2009) Unravelling the regulatory mechanisms that modulate the MEP  
471 pathway in higher plants. *J Exp Bot* **60**, 2933-2943.
- 472 Cowan, A.K., Moore-Gordon, C.S., Bertling, I. and Wolstenholme, B.N. (1997) Metabolic Control of Avocado  
473 Fruit Growth (Isoprenoid Growth Regulators and the Reaction Catalyzed by 3-Hydroxy-3-  
474 Methylglutaryl Coenzyme A Reductase). *Plant Physiol* **114**, 511-518.
- 475 Dai, Z., Cui, G., Zhou, S.F., Zhang, X. and Huang, L. (2011) Cloning and characterization of a novel 3-hydroxy-  
476 3-methylglutaryl coenzyme A reductase gene from *Salvia miltiorrhiza* involved in diterpenoid tanshinone  
477 accumulation. *J Plant Physiol* **168**, 148-157.
- 478 Devappa, R.K., Rakshit, S.K., Dekker, R.F., (2015) Forest biorefinery: Potential of poplar phytochemicals as  
479 value-added co-products. *Biotechnol Adv* **33**, 681-716.
- 480 Dueber, J.E., Wu, G.C., Malmirchegini, G.R., Moon, T.S., Petzold, C.J., Ullal, A.V., Prather, K.L. and Keasling,  
481 J.D. (2009) Synthetic protein scaffolds provide modular control over metabolic flux. *Nat Biotechnol* **27**,  
482 753-759.
- 483 Enfissi, E.M., Fraser, P.D., Lois, L.M., Boronat, A., Schuch, W. and Bramley, P.M. (2005) Metabolic engineering  
484 of the mevalonate and non-mevalonate isopentenyl diphosphate-forming pathways for the production of  
485 health-promoting isoprenoids in tomato. *Plant Biotechnol J* **3**, 17-27.
- 486 Esteban, R., Barrutia, O., Artetxe, U., Fernandez-Marin, B., Hernandez, A. and Garcia-Plazaola, J.I. (2015)

- 487 Internal and external factors affecting photosynthetic pigment composition in plants: a meta-analytical  
488 approach. *New Phytol* **206**, 268-280.
- 489 Ghirardo, A., Wright, L.P., Bi, Z., Rosenkranz, M., Pulido, P., Rodriguez-Concepcion, M., Niinemets, U.,  
490 Bruggemann, N., Gershenzon, J. and Schnitzler, J.P. (2014) Metabolic flux analysis of plastidic  
491 isoprenoid biosynthesis in poplar leaves emitting and nonemitting isoprene. *Plant Physiol* **165**, 37-51.
- 492 Gutensohn, M., Orlova, I., Nguyen, T.T., Davidovich-Rikanati, R., Ferruzzi, M.G., Sitrit, Y., Lewinsohn, E.,  
493 Pichersky, E. and Dudareva, N. (2013) Cytosolic monoterpene biosynthesis is supported by plastid-  
494 generated geranyl diphosphate substrate in transgenic tomato fruits. *Plant J* **75**, 351-363.
- 495 Hain, R., Reif, H.J., Krause, E., Langebartels, R., Kindl, H., Vornam, B., Wiese, W., Schmelzer, E., Schreier, P.H.,  
496 Stocker, R.H. and et al. (1993) Disease resistance results from foreign phytoalexin expression in a novel  
497 plant. *Nature* **361**, 153-156.
- 498 Hasunuma, T., Takeno, S., Hayashi, S., Sendai, M., Bamba, T., Yoshimura, S., Tomizawa, K., Fukusaki, E. and  
499 Miyake, C. (2008) Overexpression of 1-Deoxy-D-xylulose-5-phosphate reductoisomerase gene in  
500 chloroplast contributes to increment of isoprenoid production. *J Biosci Bioeng* **105**, 518-526.
- 501 Hemmerlin, A., Gerber, E., Feldtrauer, J.F., Wentzinger, L., Hartmann, M.A., Tritsch, D., Hoeffler, J.F., Rohmer,  
502 M. and Bach, T.J. (2004) A review of tobacco BY-2 cells as an excellent system to study the synthesis  
503 and function of sterols and other isoprenoids. *Lipids* **39**, 723-735.
- 504 Hemmerlin, A., Harwood, J. L., & Bach, T. J. (2012) A raison d'être for two distinct pathways in the early steps  
505 of plant isoprenoid biosynthesis? *Prog. Lipid Res.* **51**, 95-148.
- 506 Henriquez, M.A., Soliman, A., Li, G., Hannoufa, A., Ayele, B.T. and Daayf, F. (2016) Molecular cloning,  
507 functional characterization and expression of potato (*Solanum tuberosum*) 1-deoxy-d-xylulose 5-  
508 phosphate synthase 1 (StDXS1) in response to *Phytophthora infestans*. *Plant Sci* **243**, 71-83.
- 509 Henry, L.K., Gutensohn, M., Thomas, S.T., Noel, J.P. and Dudareva, N. (2015) Orthologs of the archaeal  
510 isopentenyl phosphate kinase regulate terpenoid production in plants. *Proc Natl Acad Sci U S A* **112**,  
511 10050-10055.
- 512 Huchelmann, A., Gastaldo, C., Veinante, M., Zeng, Y., Heintz, D., Tritsch, D., Schaller, H., Rohmer, M., Bach,  
513 T.J. and Hemmerlin, A. (2014) S-carvone suppresses cellulase-induced capsidiol production in *Nicotiana*  
514 *tabacum* by interfering with protein isoprenylation. *Plant Physiol* **164**, 935-950.
- 515 Kai, G., Xu, H., Zhou, C., Liao, P., Xiao, J., Luo, X., You, L. and Zhang, L. (2011) Metabolic engineering  
516 tanshinone biosynthetic pathway in *Salvia miltiorrhiza* hairy root cultures. *Metab Eng* **13**, 319-327.
- 517 Kim, M.J., Noh, M.H., Woo, S., Lim, H.G. and Jung, G.Y. (2019) Enhanced Lycopene Production in *Escherichia*  
518 *coli* by Expression of Two MEP Pathway Enzymes from *Vibrio* sp. *Dhg. Catalysts* **9**.
- 519 Kim, M.S., Haney, M.J., Zhao, Y., Mahajan, V., Deygen, I., Klyachko, N.L., Inskoe, E., Piroyan, A., Sokolsky, M.,  
520 Okolie, O., Hingtgen, S.D., Kabanov, A.V. and Batrakova, E.V. (2016a) Development of exosome-  
521 encapsulated paclitaxel to overcome MDR in cancer cells. *Nanomedicine* **12**, 655-664.
- 522 Kim, S.K., Han, G.H., Seong, W., Kim, H., Kim, S.W., Lee, D.H. and Lee, S.G. (2016b) CRISPR interference-  
523 guided balancing of a biosynthetic mevalonate pathway increases terpenoid production. *Metab Eng* **38**,  
524 228-240.
- 525 Kim, Y.J., Lee, O. R., Ji, Y. O., Jang, M. G., & Yang, D. C. (2014) Functional analysis of HMGR encoding genes  
526 in triterpene saponin-producing *Panax ginseng* Meyer. *Plant Physiol* **165**, 373-387.
- 527 Kirby, J. and Keasling, J.D. (2009) Biosynthesis of plant isoprenoids: perspectives for microbial engineering.  
528 *Annu Rev Plant Biol* **60**, 335-355.
- 529 Kong, L.Y. and Tan, R.X. (2015) Artemisinin, a miracle of traditional Chinese medicine. *Nat Prod Rep* **32**, 1617-  
530 1621.
- 531 Laule, O., Fürholz, A., Chang, H. S., Zhu, T., Wang, X., Heifetz, P. B., ... & Lange, M. (2003) Crosstalk between  
532 cytosolic and plastidial pathways of isoprenoid biosynthesis in *Arabidopsis thaliana*. *Proc. Natl. Acad.*  
533 *Sci. U. S. A.*, 6866-6871.

- 534 Liao, P., Chen, X., Wang, M., Bach, T.J. and Chye, M.L. (2018) Improved fruit alpha-tocopherol, carotenoid,  
535 squalene and phytosterol contents through manipulation of *Brassica juncea* 3-HYDROXY-3-  
536 METHYLGLUTARYL-COA SYNTHASE1 in transgenic tomato. *Plant Biotechnol J* **16**, 784-796.
- 537 Liao, P., Hemmerlin, A., Bach, T.J. and Chye, M.L. (2016) The potential of the mevalonate pathway for enhanced  
538 isoprenoid production. *Biotechnol Adv* **34**, 697-713.
- 539 Liao, Z.H., Chen, M., Gong, Y. F., Miao, Z. Q., Sun, X. F., & Tang, K. X. (2006) Isoprenoid biosynthesis in plants:  
540 pathways, genes, regulation and metabolic engineering. *J Biol Sci* **6**, 209–219.
- 541 Lu, X.M., Hu, X.J., Zhao, Y.Z., Song, W.B., Zhang, M., Chen, Z.L., Chen, W., Dong, Y.B., Wang, Z.H. and Lai,  
542 J.S. (2012) Map-based cloning of *zb7* encoding an IPP and DMAPP synthase in the MEP pathway of  
543 maize. *Mol Plant* **5**, 1100-1112.
- 544 Ma, D., Li, G., Zhu, Y. and Xie, D.Y. (2017) Overexpression and Suppression of *Artemisia annua* 4-Hydroxy-3-  
545 Methylbut-2-enyl Diphosphate Reductase 1 Gene (*AaHDR1*) Differentially Regulate Artemisinin and  
546 Terpenoid Biosynthesis. *Front Plant Sci* **8**, 77.
- 547 Ma, Y., Yuan, L., Wu, B., Li, X., Chen, S. and Lu, S. (2012) Genome-wide identification and characterization of  
548 novel genes involved in terpenoid biosynthesis in *Salvia miltiorrhiza*. *J Exp Bot* **63**, 2809-2823.
- 549 Mahmoud, S.S. and Croteau, R.B. (2001) Metabolic engineering of essential oil yield and composition in mint by  
550 altering expression of deoxyxylulose phosphate reductoisomerase and menthofuran synthase. *Proc Natl*  
551 *Acad Sci U S A* **98**, 8915-8920.
- 552 Merret, R., Cirioni, J., Bach, T.J. and Hemmerlin, A. (2007) A serine involved in actin-dependent subcellular  
553 localization of a stress-induced tobacco BY-2 hydroxymethylglutaryl-CoA reductase isoform. *FEBS Lett*  
554 **581**, 5295-5299.
- 555 Movahedi, A., Zhang, J., Amirian, R. and Zhuge, Q. (2014) An efficient *Agrobacterium*-mediated transformation  
556 system for poplar. *Int J Mol Sci* **15**, 10780-10793.
- 557 Movahedi, A., Zhang, J., Sun, W., Mohammadi, K., Almasi Zadeh Yaghuti, A., Wei, H., Wu, X., Yin, T. and Zhuge,  
558 Q. (2018) Functional analyses of *PtRDM1* gene overexpression in poplars and evaluation of its effect on  
559 DNA methylation and response to salt stress. *Plant Physiol Biochem* **127**, 64-73.
- 560 Movahedi, A., Zhang, J.X., Yin, T.M. and Qiang, Z.G. (2015) Functional Analysis of Two Orthologous NAC  
561 Genes, *CarNAC3*, and *CarNAC6* from *Cicer arietinum*, Involved in Abiotic Stresses in Poplar. *Plant*  
562 *Molecular Biology Reporter* **33**, 1539-1551.
- 563 Munoz-Bertomeu, J., Sales, E., Ros, R., Arrillaga, I. and Segura, J. (2007) Up-regulation of an N-terminal  
564 truncated 3-hydroxy-3-methylglutaryl CoA reductase enhances production of essential oils and sterols in  
565 transgenic *Lavandula latifolia*. *Plant Biotechnol J* **5**, 746-758.
- 566 Opitz, S., Nes, W.D. and Gershenzon, J. (2014) Both methylerythritol phosphate and mevalonate pathways  
567 contribute to biosynthesis of each of the major isoprenoid classes in young cotton seedlings.  
568 *Phytochemistry* **98**, 110-119.
- 569 Perreca, E., Rohwer, J., Gonzalez-Cabanelas, D., Loreto, F., Schmidt, A., Gershenzon, J. and Wright, L.P. (2020)  
570 Effect of Drought on the Methylerythritol 4-Phosphate (MEP) Pathway in the Isoprene Emitting Conifer  
571 *Picea glauca*. *Front Plant Sci* **11**, 546295.
- 572 Rahman, L., Kouno, H., Hashiguchi, Y., Yamamoto, H., Narbad, A., Parr, A., Walton, N., Ikenaga, T. and Kitamura,  
573 Y. (2009) HCHL expression in hairy roots of *Beta vulgaris* yields a high accumulation of p-  
574 hydroxybenzoic acid (pHBA) glucose ester, and linkage of pHBA into cell walls. *Bioresour Technol* **100**,  
575 4836-4842.
- 576 Ren, D., Liu, Y., Yang, K.Y., Han, L., Mao, G., Glazebrook, J. and Zhang, S. (2008) A fungal-responsive MAPK  
577 cascade regulates phytoalexin biosynthesis in *Arabidopsis*. *Proc Natl Acad Sci U S A* **105**, 5638-5643.
- 578 Roberts, S.C. (2007) Production and engineering of terpenoids in plant cell culture. *Nat Chem Biol* **3**, 387-395.
- 579 Rui, X., Caiqin, L., Wangjin, L., Juan, D., Zehuai, W. and Jianguo, L. (2012) 3-Hydroxy-3-methylglutaryl  
580 coenzyme A reductase 1 (*HMG1*) is highly associated with the cell division during the early stage of fruit

- 581 development which determines the final fruit size in Litchi chinensis. *Gene* **498**, 28-35.
- 582 Sakakibara, H. (2006) Cytokinins: activity, biosynthesis, and translocation. *Annu Rev Plant Biol* **57**, 431-449.
- 583 Schaller, H., Grausem, B., Benveniste, P., Chye, M.L., Tan, C.T., Song, Y.H. and Chua, N.H. (1995) Expression  
584 of the Hevea brasiliensis (H.B.K.) Mull. Arg. 3-Hydroxy-3-Methylglutaryl-Coenzyme A Reductase 1 in  
585 Tobacco Results in Sterol Overproduction. *Plant Physiol* **109**, 761-770.
- 586 Simpson, K., Quiroz, L.F., Rodriguez-Concepcion, M. and Stange, C.R. (2016) Differential Contribution of the  
587 First Two Enzymes of the MEP Pathway to the Supply of Metabolic Precursors for Carotenoid and  
588 Chlorophyll Biosynthesis in Carrot (*Daucus carota*). *Front Plant Sci* **7**, 1344.
- 589 Song, X., Yu, X., Hori, C., Demura, T., Ohtani, M. and Zhuge, Q. (2016) Heterologous Overexpression of Poplar  
590 SnRK2 Genes Enhanced Salt Stress Tolerance in Arabidopsis thaliana. *Front Plant Sci* **7**, 612.
- 591 Takahashi, S., Kuzuyama, T., Watanabe, H. and Seto, H. (1998) A 1-deoxy-D-xylulose 5-phosphate  
592 reductoisomerase catalyzing the formation of 2-C-methyl-D-erythritol 4-phosphate in an alternative  
593 nonmevalonate pathway for terpenoid biosynthesis. *Proc Natl Acad Sci U S A* **95**, 9879-9884.
- 594 Tiski, I., Marraccini, P., Pot, D., Vieira, L.G. and Pereira, L.F. (2011) Characterization and expression of two  
595 cDNA encoding 3-Hydroxy-3-methylglutaryl coenzyme A reductase isoforms in coffee (*Coffea arabica*  
596 L.). *OMICS* **15**, 719-727.
- 597 Vaccaro, M., Malafrente, N., Alfieri, M., De Tommasi, N. and Leone, A. (2014) Enhanced biosynthesis of  
598 bioactive abietane diterpenes by overexpressing AtDXS or AtDXR genes in *Salvia sclarea* hairy roots.  
599 *Plant Cell Tissue and Organ Culture* **119**, 65-77.
- 600 van Schie, C.C., Haring, M.A. and Schuurink, R.C. (2006) Regulation of terpenoid and benzenoid production in  
601 flowers. *Curr Opin Plant Biol* **9**, 203-208.
- 602 Wang, H., Nagegowda, D.A., Rawat, R., Bouvier-Nave, P., Guo, D., Bach, T.J. and Chye, M.L. (2012)  
603 Overexpression of Brassica juncea wild-type and mutant HMG-CoA synthase 1 in Arabidopsis up-  
604 regulates genes in sterol biosynthesis and enhances sterol production and stress tolerance. *Plant*  
605 *Biotechnol J* **10**, 31-42.
- 606 Wei, Y., Mohsin, A., Hong, Q., Guo, M. and Fang, H. (2018) Enhanced production of biosynthesized lycopene via  
607 heterogenous MVA pathway based on chromosomal multiple position integration strategy plus plasmid  
608 systems in Escherichia coli. *Bioresour Technol* **250**, 382-389.
- 609 Wille, A., Zimmermann, P., Vranova, E., Furholz, A., Laule, O., Bleuler, S., Hennig, L., Prelic, A., von Rohr, P.,  
610 Thiele, L., Zitzler, E., Gruissem, W. and Buhmann, P. (2004) Sparse graphical Gaussian modeling of the  
611 isoprenoid gene network in Arabidopsis thaliana. *Genome Biol* **5**, R92.
- 612 Xie, Z., Kapteyn, J. and Gang, D.R. (2008) A systems biology investigation of the MEP/terpenoid and  
613 shikimate/phenylpropanoid pathways points to multiple levels of metabolic control in sweet basil  
614 glandular trichomes. *Plant J* **54**, 349-361.
- 615 Xing, L., Zhang, D., Zhao, C., Li, Y., Ma, J., An, N. and Han, M. (2016) Shoot bending promotes flower bud  
616 formation by miRNA-mediated regulation in apple (*Malus domestica* Borkh.). *Plant Biotechnol J* **14**,  
617 749-770.
- 618 Xing, S., Miao, J., Li, S., Qin, G., Tang, S., Li, H., Gu, H. and Qu, L.J. (2010) Disruption of the 1-deoxy-D-  
619 xylulose-5-phosphate reductoisomerase (DXR) gene results in albino, dwarf and defects in trichome  
620 initiation and stomata closure in Arabidopsis. *Cell Res* **20**, 688-700.
- 621 Xu, C., Wei, H., Movahedi, A., Sun, W., Ma, X., Li, D., Yin, T. and Zhuge, Q. (2019) Evaluation, characterization,  
622 expression profiling, and functional analysis of DXS and DXR genes of *Populus trichocarpa*. *Plant*  
623 *Physiol Biochem* **142**, 94-105.
- 624 Xu, J.W., Xu, Y.N. and Zhong, J.J. (2012) Enhancement of ganoderic acid accumulation by overexpression of an  
625 N-terminally truncated 3-hydroxy-3-methylglutaryl coenzyme A reductase gene in the basidiomycete  
626 *Ganoderma lucidum*. *Appl Environ Microbiol* **78**, 7968-7976.
- 627 Yamaguchi, S., Kamiya, Y., & Nambara, E. (2018) Regulation of ABA and GA levels during seed development

- 628 and germination in Arabidopsis. *Annu Plant Rev* **27**, 224–247.
- 629 Yang, J., Guo, L. (2014) Biosynthesis of  $\beta$ -carotene in engineered E. coli using the MEP and MVA pathways.
- 630 *Microb Cell Fact*, 160.
- 631 Zhang, H., Niu, D., Wang, J., Zhang, S., Yang, Y., Jia, H. and Cui, H. (2015) Engineering a Platform for
- 632 Photosynthetic Pigment, Hormone and Membrane-Related Diterpenoid Production in *Nicotiana tabacum*.
- 633 *Plant Cell Physiol* **56**, 2125-2138.
- 634 Zhang, J., Li, J., Liu, B., Zhang, L., Chen, J. and Lu, M. (2013) Genome-wide analysis of the *Populus* Hsp90 gene
- 635 family reveals differential expression patterns, localization, and heat stress responses. *BMC Genomics*
- 636 **14**, 532.
- 637 Zhang, K.K., Fan, W., Huang, Z.W., Chen, D.F., Yao, Z.W., Li, Y.F., Yang, Y.F. and Qiu, D.Y. (2019) Transcriptome
- 638 analysis identifies novel responses and potential regulatory genes involved in 12-deoxyphorbol-13-
- 639 phenylacetate biosynthesis of *Euphorbia resinifera*. *Industrial Crops and Products* **135**, 138-145.
- 640 Zhang, L., Ding, R., Chai, Y., Bonfill, M., Moyano, E., Oksman-Caldentey, K.M., Xu, T., Pi, Y., Wang, Z., Zhang,
- 641 H., Kai, G., Liao, Z., Sun, X. and Tang, K. (2004) Engineering tropane biosynthetic pathway in
- 642 *Hyoscyamus niger* hairy root cultures. *Proc Natl Acad Sci U S A* **101**, 6786-6791.
- 643 Zhang, Y., Zhao, Y., Wang, J., Hu, T., Tong, Y., Zhou, J., Song, Y., Gao, W. and Huang, L. (2018) Overexpression
- 644 and RNA interference of TwDXR regulate the accumulation of terpenoid active ingredients in
- 645 *Tripterygium wilfordii*. *Biotechnol Lett* **40**, 419-425.
- 646

## 647 **6. Figure legends**

648 **Figure 1 | MEP- and MVA-related genes analyses in overexpressed *PtHMGR*- and *PtDXR-O***

649 ***Es poplars*. a**, MVA-related genes *AACT*, *HMGS*, *MVK*, *MVD*, and *FPS* affected by *PtHMGR* over

650 expressing. **b**, MEP-related genes *DXS*, *MCT*, *CMK*, *HDS*, *HDR*, *IDI*, *GPS*, *GPPS*, and *DXR* affected

651 d by *PtHMGR* overexpressing. **c**, MVA-related genes *AACT*, *HMGS*, *HMGR*, *MVK*, *MVD*, and *FP*

652 *S* affected by *PtDXR* overexpressing. **d**, MEP-related genes *DXS*, *DXR*, *MCT*, *CMK*, *HDS*, *HDR*, *ID*

653 *I*, *GPS*, and *GPPS* affected by *PtDXR* overexpressing. *PtActin* was used as an internal reference

654 in all repeats; \* P < 0.05, \*\* P < 0.01, \*\*\*P < 0.001, \*\*\*\*P < 0.0001; Three independent repli

655 cations were performed in this experiment.

656 **Figure 2 | HPLC-MS/MS content analyses of lycopene,  $\beta$ -carotene, Lutein, and real-time PCR**

657 **of *ZEP* and *NCED* genes family.** HPLC-MS/MS content analyses have been performed to show

658 the effect of *PtHMGR-OEs* on **a**, lycopene **b**,  $\beta$ -carotene, and **c**, lutein. Relative expressions

659 have been analyzed affected by *PtHMGR-OEs* comparing with NT poplars of **d**, *ZEP*,

660 and **e**, *NCED* genes family. Bars represent mean  $\pm$  SD (n = 3); Stars reveal significant differences,

661 \* P < 0.05, \*\* P < 0.01, \*\*\* P < 0.001, \*\*\*\*P < 0.0001; Three independent experiments were

662 performed in these analyses.

663 **Figure 3 | HPLC-MS/MS content analyses of lycopene,  $\beta$ -carotene, Lutein, and real-time PCR**

664 **of *ZEP* and *NCED* genes family.** HPLC-MS/MS content analyses have been performed to show



665 the effect of *PtDXR-OEs* on **a**, lycopene **b**,  $\beta$ -carotene, and **c**, lutein. Relative expressions have  
666 been analyzed affected by *PtDXR-OEs* comparing with NT poplars of **d**, *ZEP*,  
667 and **e**, *NCED* genes family. Bars represent mean  $\pm$  SD (n = 3); Stars reveal significant differences,  
668 \* P < 0.05, \*\* P < 0.01, \*\*\* P < 0.001, \*\*\*\*P < 0.0001; Three independent experiments were  
669 performed in these analyses.

670 **Figure 4 | HPLC-MS/MS content analyses of MEP- and MVA-derived isoprenoids. a,b,c,d,**  
671 **and e**, Violin plots reveal the contents of isoprenoids GA3, tZR, IPA, DCS, and CS obtained from  
672 MEP- and MVA-pathways influenced by *PtHMGR-* and *PtDXR-OEs*. **f,g,h,i, and j**, the column  
673 plots reveal the effect of *PtHMGR-OE3* and -7 and *PtDXR-OE1* and -3 on the mentioned above  
674 isoprenoids separately; NT poplars have been used as the control. Bars represent mean  $\pm$  SD  
675 (n = 3); Stars reveal significant differences, \*P < 0.05, \*\*P < 0.01, \*\*\*P < 0.001, \*\*\*\*P <  
676 0.0001. k,l,m,n, and o, represent the HPLC-MS/MS chromatogram content analyses of GA3,  
677 tZR, IPA, DCS, and CS, respectively affected by *PtHMGR-* and *PtDXR-OEs* comparing with NT  
678 poplars.

679 **Figure 5 | Phenotypic changes resulted by affected MVA- and MEP- pathway interactions in**  
680 **45-day-old poplars. a**, Mean comparisons of stem lengths revealed significantly higher  
681 lengths *PtDXR-OEs* than NT poplars compared with *PtHMGR-OEs*. *PtHMGR* transgenics also  
682 revealed significantly higher lengths than NT poplars. **b**, Mean comparisons of *ZEP* and *NCED*  
683 relative expressions between *PtHMGR-and PtDXR-OEs* compared to NT poplars. **c**, Mean  
684 comparisons of stem diameters revealed less significant differences between *PtDXR-OEs* and  
685 NT poplars. Stars reveal significant differences, \*P < 0.05, \*\*P < 0.01, \*\*\*P < 0.001, \*\*\*\*P <  
686 0.0001. **d(I)**, The *PtDXR* transgenic revealed a higher stem length than *PtHMGR-OEs* and NT  
687 poplars. **d(II)**, The *PtHMGR* transgenic presents an insignificantly more stem development  
688 than NT poplar. **d(III)**, NT poplar was used as a control; Scale bar represents 1 cm.

689 **Figure 6 | The interactions between MEP- and MVA-pathways.** The IPP and DMAPP are  
690 considered the common precursors of the MEP- and MVA-pathways between cytoplasm and  
691 plastid. In addition, the putative communication generates between MVA- and MEP-related  
692 genes and MVA- and MEP-derived products. MVA: mevalonic acid, MEP: methylerythritol  
693 phosphate, IPP: isopentenyl diphosphate, DMAPP: dimethylallyl diphosphate, AACT:  
694 acetoacetyl CoA thiolase, HMGS: 3-hydroxy-3-methylglutaryl-CoA synthase, HMG-CoA: 3-  
695 hydroxy-3-methylglutaryl-CoA, HMGR: 3-hydroxy-3-methylglutaryl-CoA reductase, MVK:

696 mevalonate kinase, MVD: mevalonate5-diphosphate decarboxylase, IPP: isopentenyl  
697 diphosphate, IDI: IPP isomerase, GPP: geranyldiphosphate, FPP: farnesylidiphosphate, GPS:  
698 geranyl phosphate synthase, FPS: farnesyl-diphosphate synthase, GPPS: geranyl diphosphate  
699 synthase, GGPPS: geranyl geranyl diphosphate synthase, DXS: 1-deoxy-D-xylulose5-phosphate  
700 synthase, DXP: 1-deoxy-D-xylulose5-phosphate, DXR: 1-deoxy-D-xylulose5-phosphate  
701 reductoisomerase, HDS: 1-hydroxy-2-methyl-2-(E)-butenyl4-diphosphate synthase, HDR: 1-  
702 hydroxy-2-methyl-2-(E)-butenyl4-diphosphate reductase, MCT: MEP cytidyltransferase,  
703 CMK: 4-diphosphocytidyl-2-C-methyl-D-erythritol kinase.

#### 704 **Supplemental figures and table**

705 **Supplemental Figure 1 | Amino acid sequences alignment of PtHMGR protein and other**  
706 **known HMGR proteins.** *A. thaliana* (NP\_177775.2), *G. hirsutum* (XP\_016691783.1), *M.*  
707 *domestica* (XP\_008348952.1), *M. esculenta* (XP\_021608133.1), *P. persica* (XM\_020569919.1),  
708 *O. sativa* (XM\_015768351.2), *T. cacao* (XM\_007043046.2), *Z. mays* (PWZ28886.1). The HMG-  
709 CoA and NADPH binding domains are indicated in red rectangular.

710 **Supplemental Figure 2 | Construction of a phylogenetic tree based on the HMGR sequences**  
711 **of various species.** Accession numbers of the HMGR obtained from Phytozome are as follows:  
712 *A. thaliana* (AT1G76490 and AT2G17370) , *P. trichocarpa* (Potri.011G145000,  
713 Potri.005G257000, Potri.004G208500, Potri.001G457000, Potri.009G169900 and  
714 Potri.002G004000), *Gossypium raimondii* (Gorai.008G013000, Gorai.002G146000,  
715 Gorai.002G014700, Gorai.005G215800, Gorai.012G138100, Gorai.005G215500,  
716 Gorai.005G215600 and Gorai.005G215700), *Malus domestica* (MDP0000157996,  
717 MDP0000268909, MDP0000372490, MDP0000251253 and MDP0000312032), *Manihot*  
718 *esculenta* (Manes.15G114100, Manes.01G157500, Manes.03G096600, Manes.02G116900  
719 and Manes.05G128600), *Oryza sativa* (LOC\_Os09g31970, LOC\_Os08g40180 and  
720 LOC\_Os02g48330), *Prunus persica* (Prupe.7G187000, Prupe.7G187500 and Prupe.8G182300),  
721 *Theobroma cacao* (Thecc1EG000025, Thecc1EG007601 and Thecc1EG034814), and *Zea mays*  
722 (GRMZM2G393337, GRMZM2G058095, GRMZM2G136465, GRMZM2G001645 and  
723 GRMZM2G043503).

724 **Supplemental Figure 3 | Molecular identification of PtHMGR-OEs.** (A) PCR identification of  
725 *PtHMGR* in *PtHMGR-OEs* and NT poplars. Lane M: 15K molecular mass marker (TransGen,  
726 China); lane 1: genome DNA from WT as negative control; lanes 2–9: genome DNA from



727 *PtHMGR-OE* lines **(B)** qRT-PCR identification of the transcript levels of *PtHMGR* in *PtHMGR-*  
728 *OEs* and NT poplars. Three independent experiments were performed; Stars reveal significant  
729 differences, \*  $P < 0.05$ , \*\*  $P < 0.01$ , \*\*\*  $P < 0.001$ .

730 **Supplemental Figure 4** | HPLC chromatograms of analyzing the contents of **(A)**  $\beta$ -carotene, **(B)**  
731 lycopene, and **(C)** lutein in NT poplars and *PtHMGR-OEs*.

732 **Supplemental Figure 5** | HPLC-MS/MS chromatogram analyses of the contents of **(A)** GA3, **(B)**  
733 TZR, **(C)** IPA, **(D)** DCS, and **(E)** CS affected by *PtHMGR-OE3* and -7 comparing with NT poplars.

734 **Supplemental Figure 6** | **Chromatogram analyses of GA3 standards via HPLC-MS/MS.** The  
735 chromatogram of standard GA3 at **(A)** 0.1, **(B)** 0.2, **(C)** 0.5, **(D)** 2, **(E)** 5, **(F)** 20, **(G)** 50, and **(H)**  
736 200 ng/mL concentrations. **(I)** Equations for the GA3 standard curves.

737 **Supplemental Figure 7** | **Chromatogram analyses of tZR standards via HPLC-MS/MS.** The  
738 chromatogram of standard tZR at **(A)** 0.1, **(B)** 0.2, **(C)** 0.5, **(D)** 2, **(E)** 5, **(F)** 20, **(G)** 50, and **(H)**  
739 200 ng/mL concentrations. **(I)** Equations for the tZR standard curves.

740 **Supplemental Figure 8** | **Chromatogram analyses of IPA standards via HPLC-MS/MS.** The  
741 chromatogram of standard IPA at **(A)** 0.2, **(B)** 0.5, **(C)** 2, **(D)** 5, **(E)** 20, **(F)** 50, and **(G)** 200 ng/mL  
742 concentrations. **(H)** Equations for the IPA standard curves.

743 **Supplemental Figure 9** | **Chromatogram analyses of DCS standards via HPLC-MS/MS.** The  
744 chromatogram of standard DCS at **(A)** 0.5, **(B)** 2, **(C)** 10, **(D)** 20, and **(E)** 50 ng/mL concentrations.  
745 **(F)** Equations for the DCS standard curves.

746 **Supplemental Figure 10** | **Chromatogram analyses of CS standards via HPLC-MS/MS.** The  
747 chromatogram of standard CS at **(A)** 0.5, **(B)** 5, **(C)** 10, **(D)** 20, and **(E)** 50 ng/mL concentrations.  
748 **(F)** Equations for the CS standard curves.

749 **Supplemental Table 1** | Primers were used in this study.

750 **Supplemental Table 2** | Table of data analyses used in phenotypic changes evaluation. **a**, Stem  
751 diameter data analyses. **b**, Stem length data analyses.

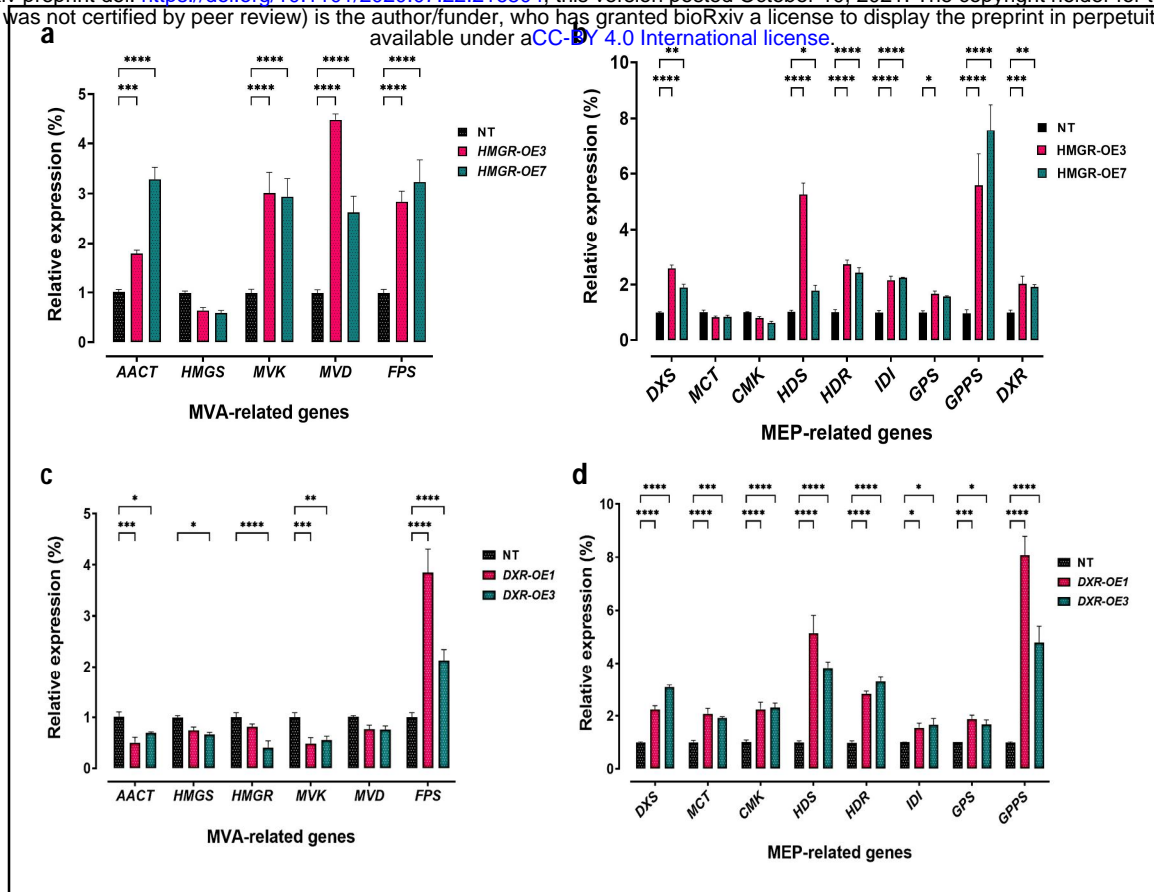

**Figure 1 | MEP- and MVA-related genes analyses in overexpressed *PtHMGR*- and *PtDXR*-OEs poplars. a**, MVA-related genes *AACT*, *HMGS*, *MVK*, *MVD*, and *FPS* affected by *PtHMGR* overexpressing. **b**, MEP-related genes *DXS*, *MCT*, *CMK*, *HDS*, *HDR*, *IDI*, *GPS*, *GPPS*, and *DXR* affected by *PtHMGR* overexpressing. **c**, MVA-related genes *AACT*, *HMGS*, *HMGR*, *MVK*, *MVD*, and *FPS* affected by *PtDXR* overexpressing. **d**, MEP-related genes *DXS*, *DXR*, *MCT*, *CMK*, *HDS*, *HDR*, *IDI*, *GPS*, and *GPPS* affected by *PtDXR* overexpressing. *PtActin* was used as an internal reference in all repeats; \*  $P < 0.05$ , \*\*  $P < 0.01$ , \*\*\*  $P < 0.001$ , \*\*\*\*  $P < 0.0001$ ; Three independent replications were performed in this experiment.

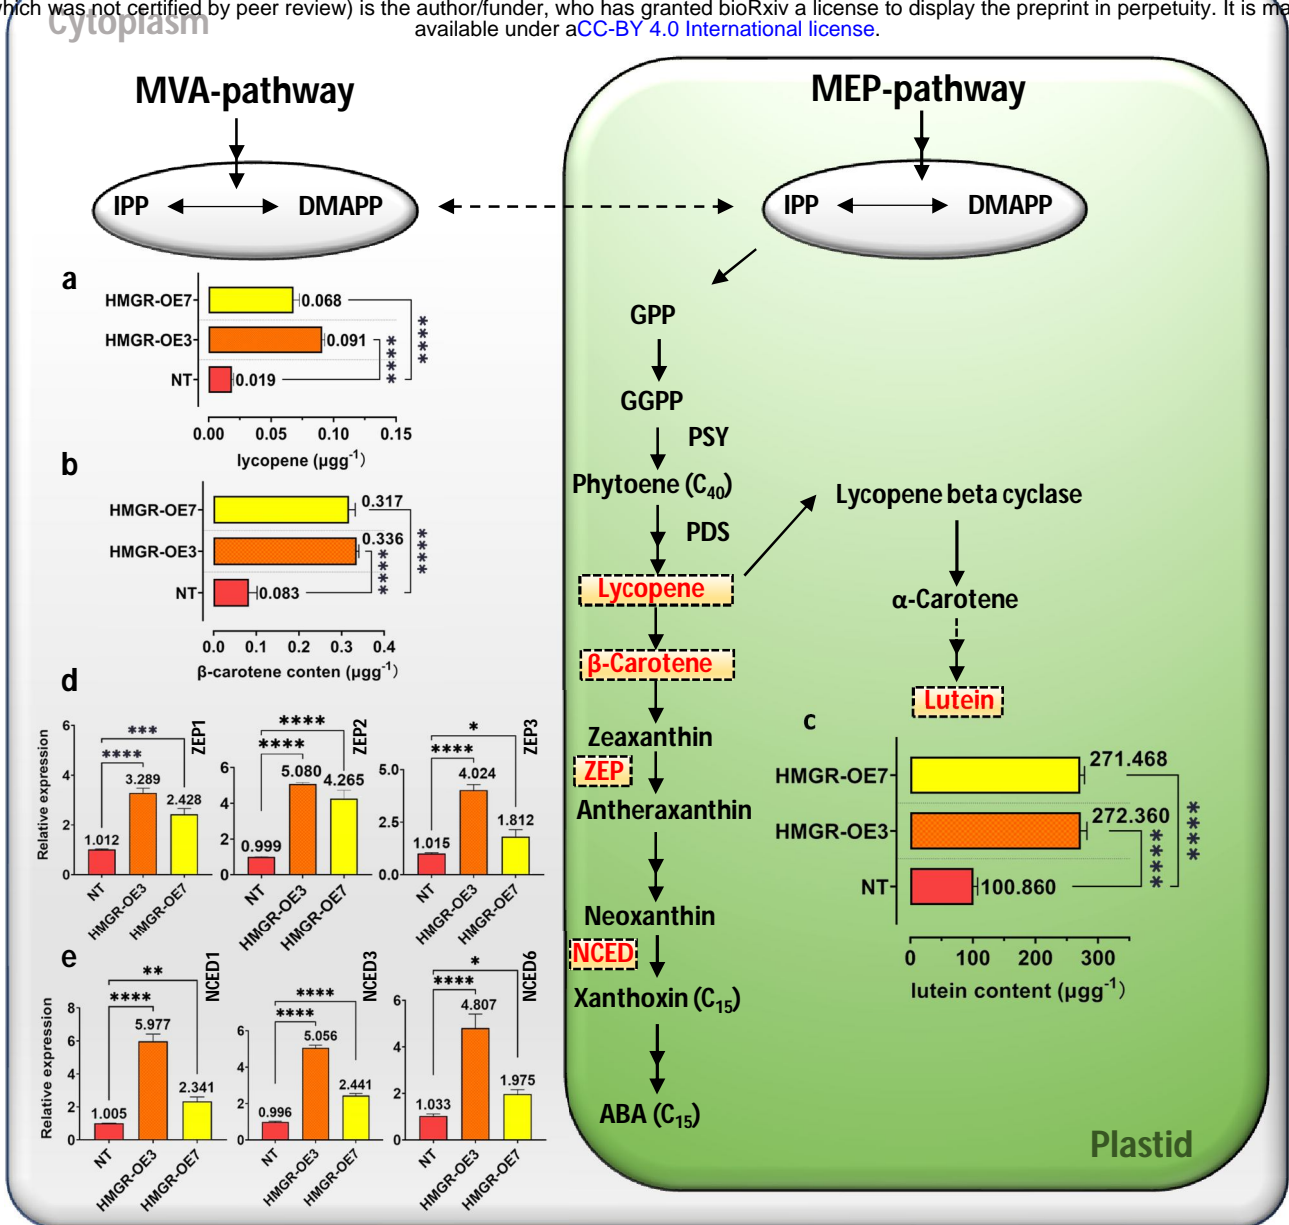

**Figure 2 | HPLC-MS/MS content analyses of lycopene,  $\beta$ -carotene, lutein, and real-time PCR of ZEP and NCED genes family.** HPLC-MS/MS content analyses have been performed to show the effect of *PtHMGR-OEs* on **a**, lycopene **b**,  $\beta$ -carotene, and **c**, lutein. Relative expressions have been analyzed affected by *PtHMGR-OEs* comparing with NT poplars of **d**, ZEP, and **e**, NCED genes family. Bars represent mean  $\pm$  SD (n = 3); Stars reveal significant differences, \* P < 0.05, \*\* P < 0.01, \*\*\* P < 0.001, \*\*\*\*P < 0.0001; Three independent experiments were performed in these analyses.

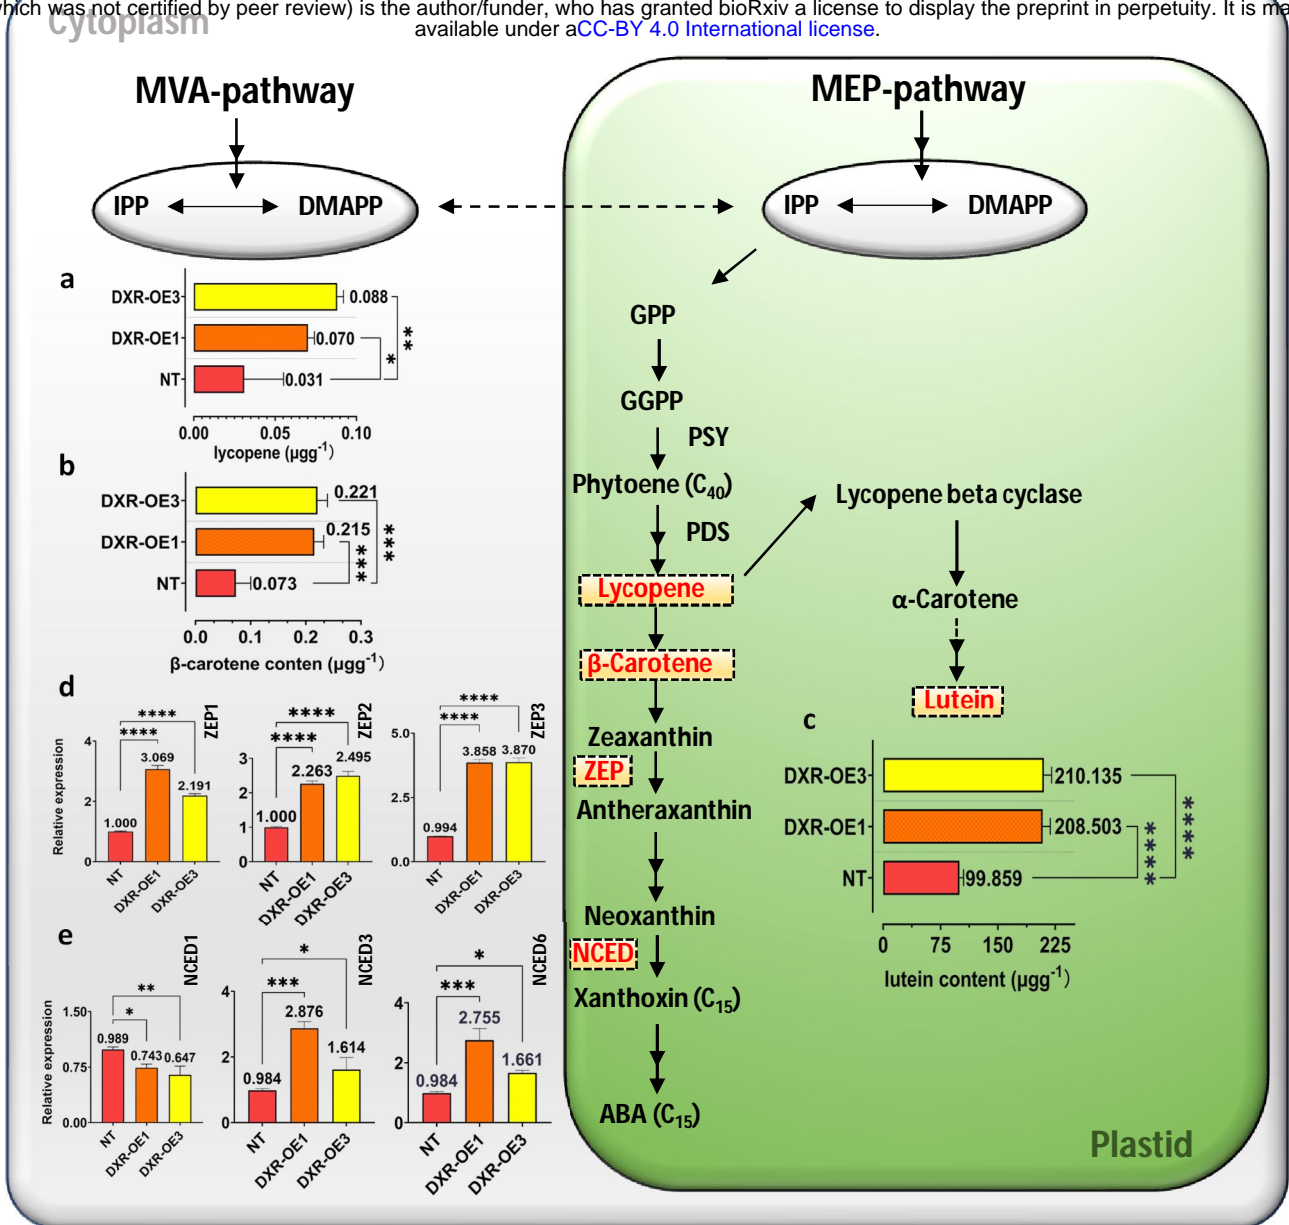

**Figure 3 | HPLC-MS/MS content analyses of lycopene,  $\beta$ -carotene, lutein, and real-time PCR of ZEP and NCED genes family.** HPLC-MS/MS content analyses have been performed to show the effect of *PtDXR*-OEs on **a**, lycopene **b**,  $\beta$ -carotene, and **c**, lutein. Relative expressions have been analyzed affected by *PtDXR*-OEs comparing with NT poplars of **d**, ZEP, and **e**, NCED genes family. Bars represent mean  $\pm$  SD (n = 3); Stars reveal significant differences, \* P < 0.05, \*\* P < 0.01, \*\*\* P < 0.001, \*\*\*\*P < 0.0001; Three independent experiments were performed in these analyses.

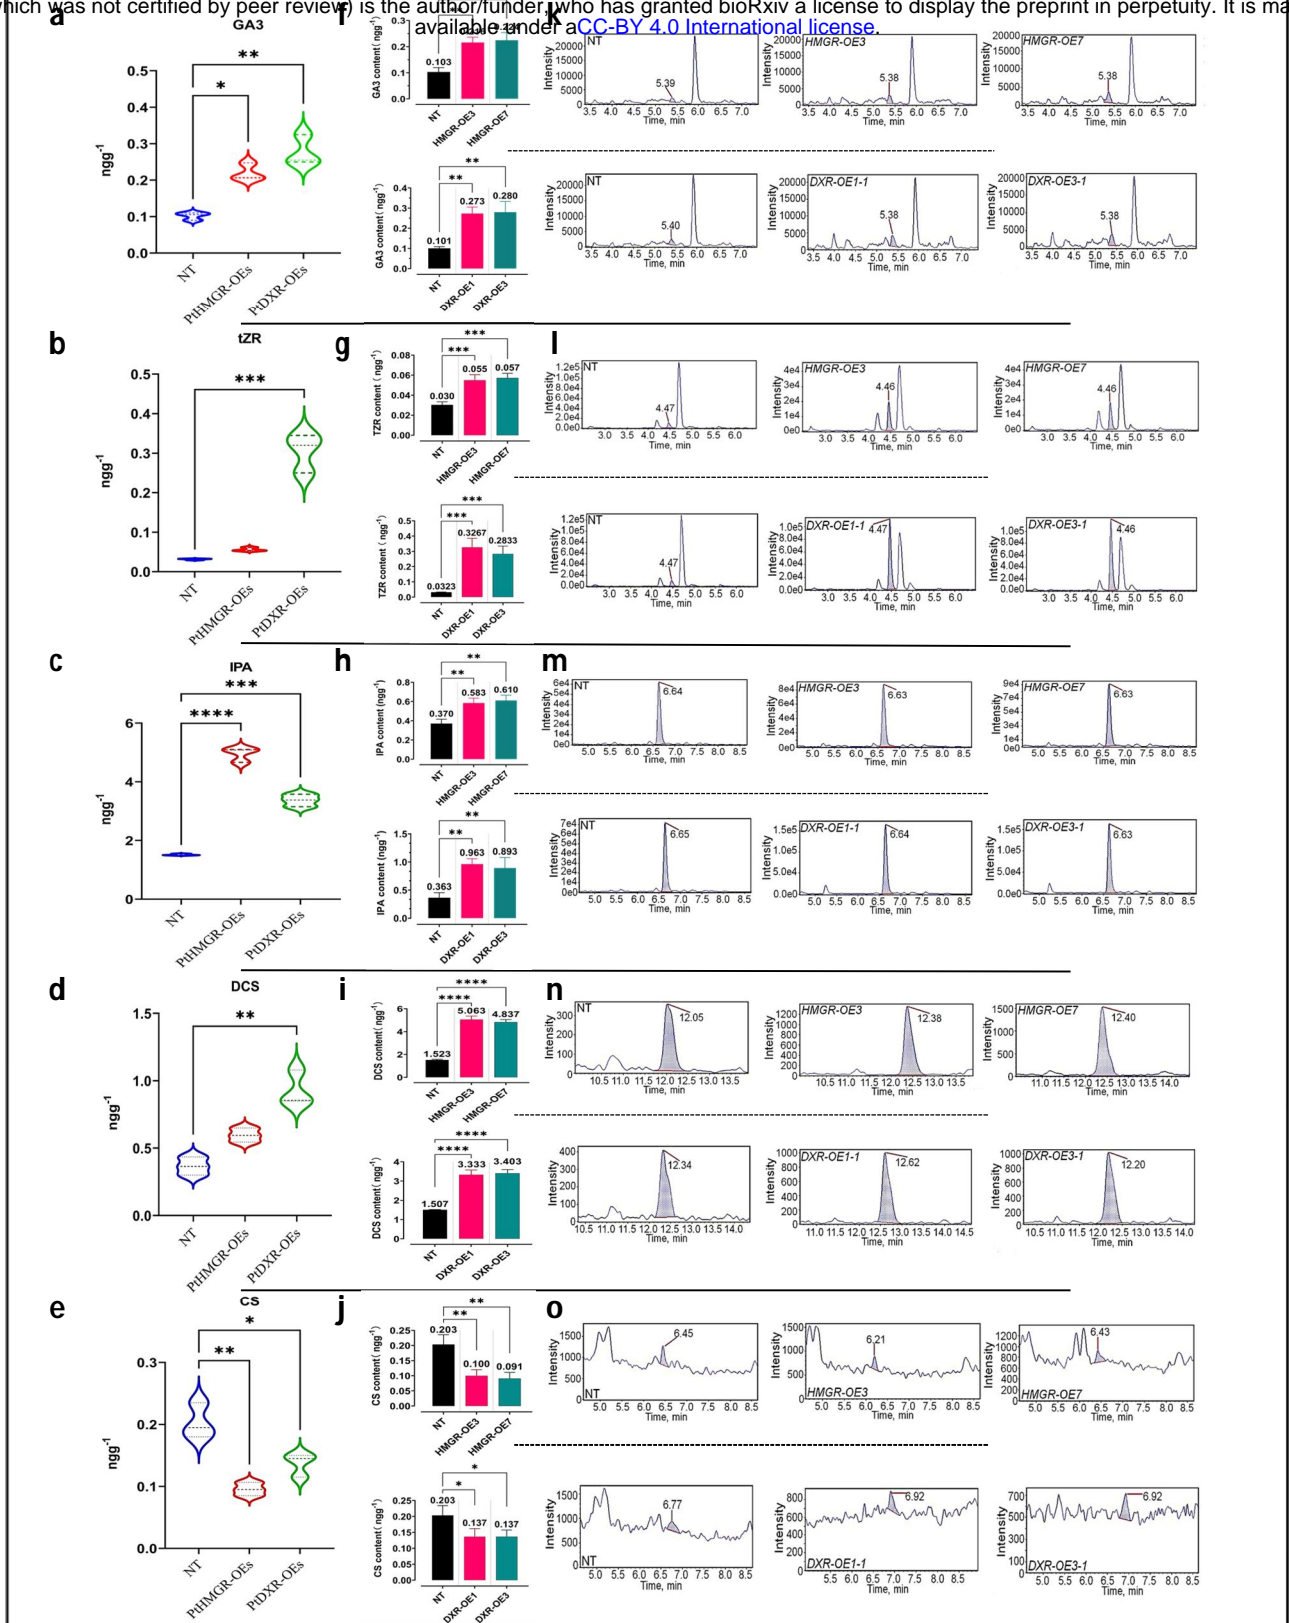

**Figure 4 | HPLC-MS/MS content analyses of MEP- and MVA-derived isoprenoids. a,b,c,d, and e,** Violin plots reveal the contents of isoprenoids GA3, tZR, IPA, DCS, and CS obtained from MEP- and MVA-pathways influenced by *PthMGR*- and *PtdXR*-OEs. **f,g,h,i, and j,** the column plots reveal the effect of *PthMGR-OE3* and *-7* and *PtdXR-OE1* and *-3* on the mentioned above isoprenoids separately; NT poplars have been used as the control. Bars represent mean  $\pm$  SD (n = 3); Stars reveal significant differences, \*P < 0.05, \*\*P < 0.01, \*\*\*P < 0.001, \*\*\*\*P < 0.0001. **k,l,m,n, and o,** represent the HPLC-MS/MS chromatogram content analyses of GA3, tZR, IPA, DCS, and CS, respectively affected by *PthMGR*- and *PtdXR*-OEs comparing with NT poplars.



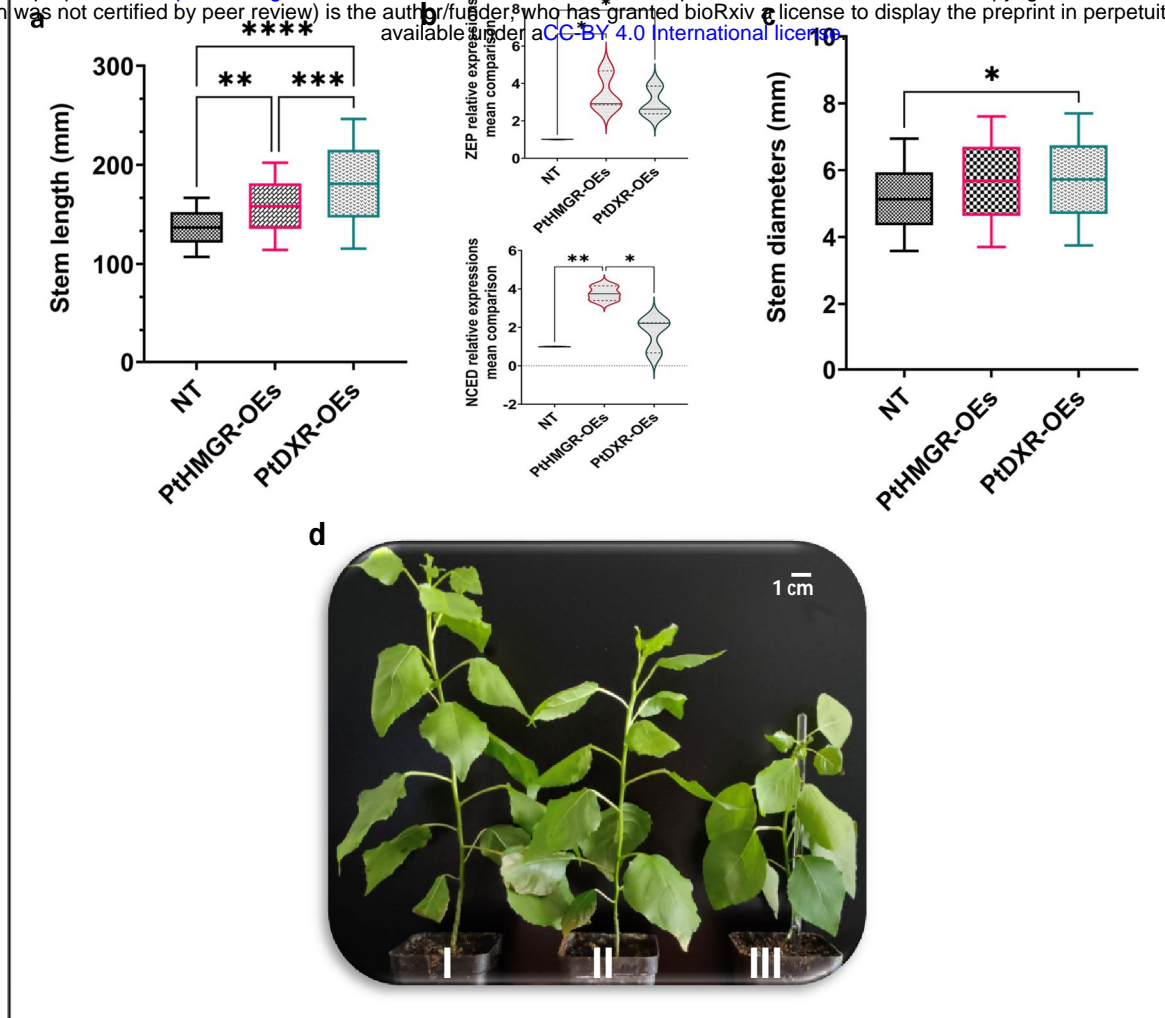

**Figure 5 | Phenotypic changes resulted by affected MVA- and MEP- pathway interactions in 45-day-old poplars.** **a**, Mean comparisons of stem lengths revealed significantly higher lengths *PtDXR-OEs* than NT poplars compared with *PtHMGR-OEs*. *PtHMGR* transgenics also revealed significantly higher lengths than NT poplars. **b**, Mean comparisons of *ZEP* and *NCED* relative expressions between *PtHMGR*- and *PtDXR-OEs* compared to NT poplars. **c**, Mean comparisons of stem diameters revealed less significant differences between *PtDXR-OEs* and NT poplars. Stars reveal significant differences, \* $P < 0.05$ , \*\* $P < 0.01$ , \*\*\* $P < 0.001$ , \*\*\*\* $P < 0.0001$ . **d**(I), The *PtDXR* transgenic revealed a higher stem length than *PtHMGR-OEs* and NT poplars. **d**(II), The *PtHMGR* transgenic presents an insignificantly more stem development than NT poplar. **d**(III), NT poplar was used as a control; Scale bar represents 1 cm.

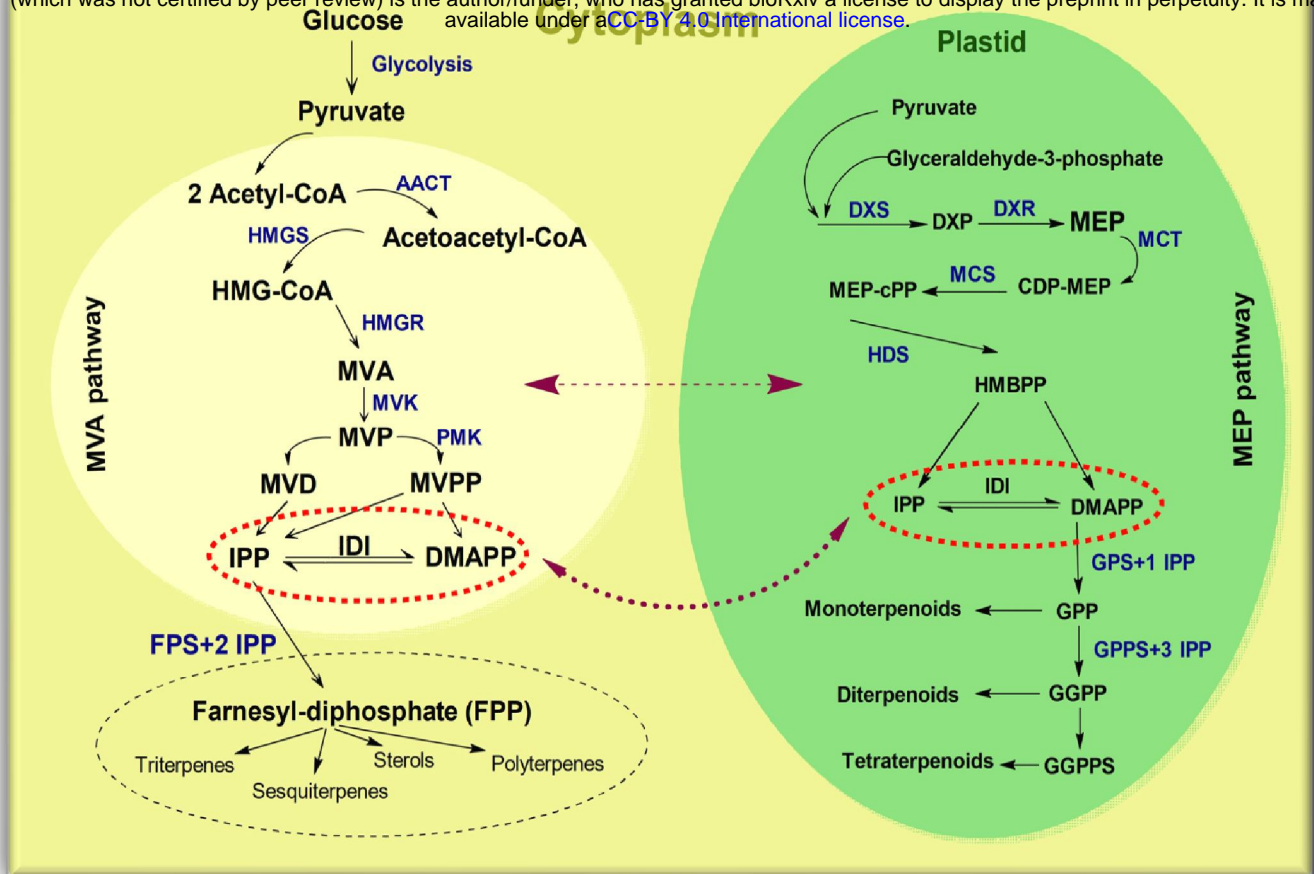

**Figure 6 | The interactions between MEP- and MVA-pathways.** The IPP and DMAPP are considered the common precursors of the MEP- and MVA-pathway between cytoplasm and plastid. In addition, the putative communication generates between MVA- and MEP-related genes and MVA- and MEP-derived products. MVA: mevalonic acid, MEP: methylerythritol phosphate, IPP: isopentenyl diphosphate, DMAPP: dimethylallyl diphosphate, AACT: acetoacetyl CoA thiolase, HMGS: 3-hydroxy-3-methylglutaryl-CoA synthase, HMGR: 3-hydroxy-3-methylglutaryl-CoA reductase, MVK: mevalonate kinase, MVD: mevalonate5-diphosphate decarboxylase, IPP: isopentenyl diphosphate, IDI: IPP isomerase, GPP: geranyldiphosphate, FPP: famesyldiphosphate, GPS: geranyl phosphate synthase, FPS: farnesyl-diphosphate synthase, GPPS: geranyl diphosphate synthase, GGPPS: geranyl geranyl diphosphate synthase, DXS: 1-deoxy-D-xylulose5-phosphate synthase, DXP: 1-deoxy-D-xylulose5-phosphate, DXR: 1-deoxy-D-xylulose5-phosphate reductoisomerase, HDS: 1-hydroxy-2-methyl-2-(E)-butenyl4-diphosphate synthase, HDR: 1-hydroxy-2-methyl-2-(E)-butenyl4-diphosphate reductase, MCT: MEP cytidyltransferase, CMK: 4-diphosphocytidyl-2-C-methyl-D-erythritol kinase.



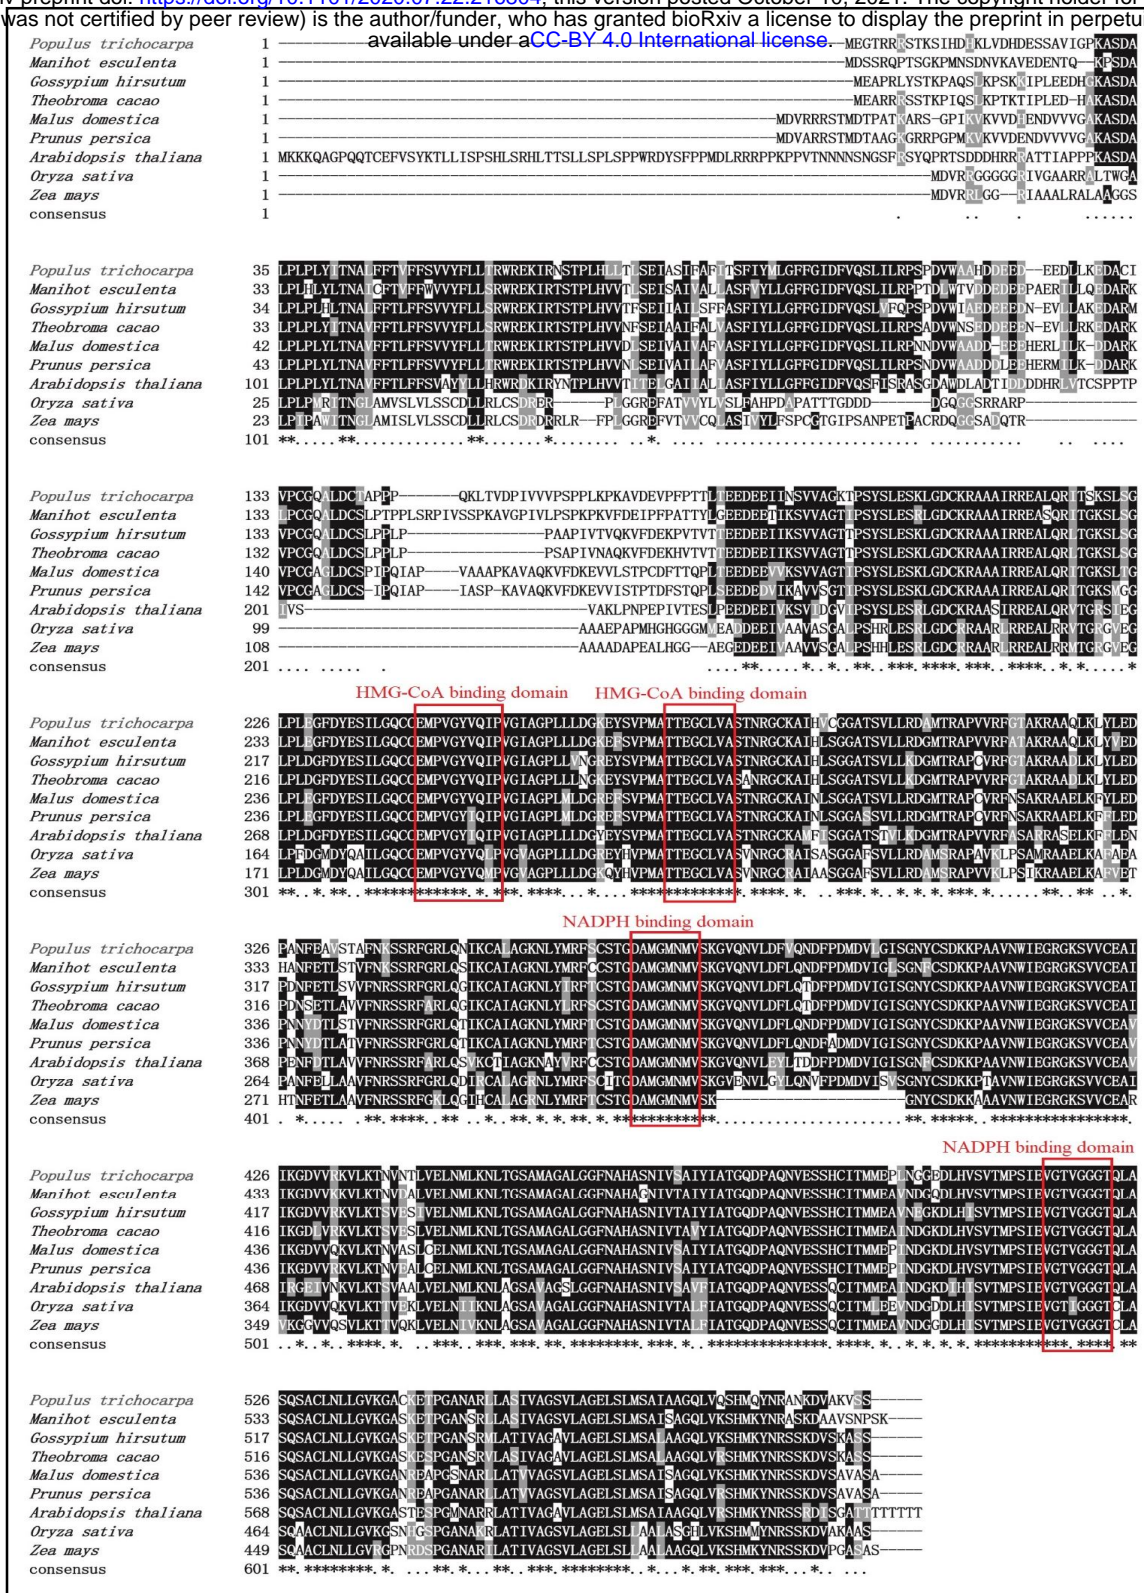

**Supplemental Figure 1 | Amino acid sequences alignment of PthMGR protein and other known HMGR proteins.** A. *thaliana* (NP\_177775.2), *G. hirsutum* (XP\_016691783.1), *M. domestica* (XP\_008348952.1), *M. esculenta* (XP\_021608133.1), *P. persica* (XM\_020569919.1), *O. sativa* (XM\_015768351.2), *T. cacao* (XM\_007043046.2), *Z. mays* (PWZ28886.1). The HMG-CoA and NADPH binding domains are indicated in red rectangle.

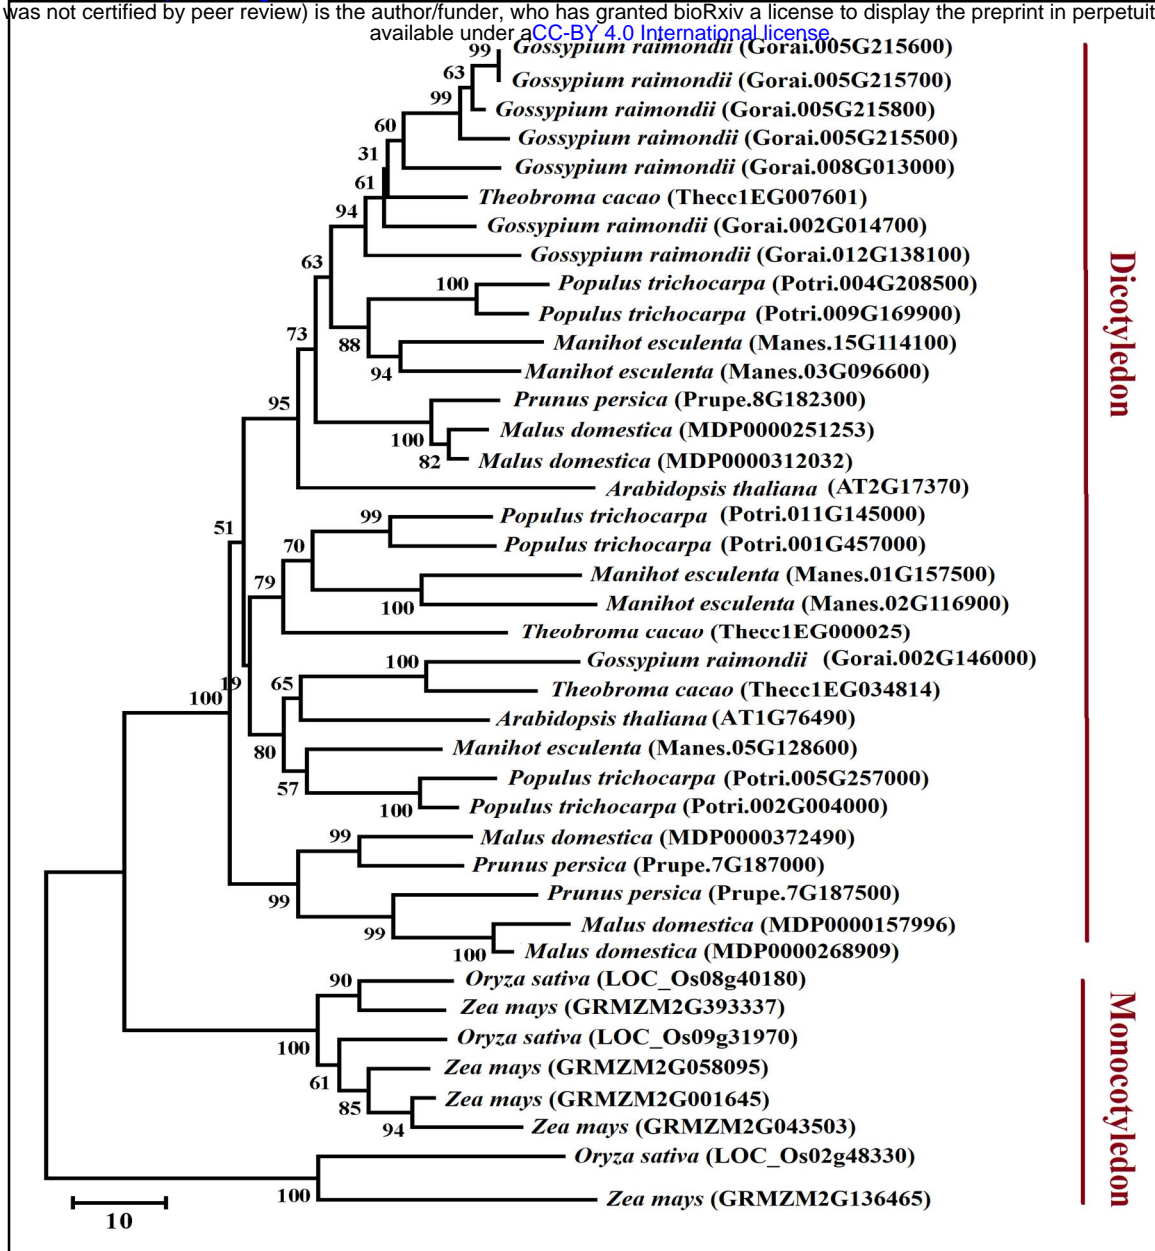

**Supplemental Figure 2 | Construction of a phylogenetic tree based on the *HMGR* sequences of various species.** Accession numbers of the *HMGR* obtained from Phytozome are as follows: *A. thaliana* (AT1G76490 and AT2G17370), *P. trichocarpa* (Potri.011G145000, Potri.005G257000, Potri.004G208500, Potri.001G457000, Potri.009G169900 and Potri.002G004000), *Gossypium raimondii* (Gorai.008G013000, Gorai.002G146000, Gorai.002G014700, Gorai.005G215800, Gorai.012G138100, Gorai.005G215500, Gorai.005G215600 and Gorai.005G215700), *Malus domestica* (MDP0000157996, MDP0000268909, MDP0000372490, MDP0000251253 and MDP0000312032), *Manihot esculenta* (Manes.15G114100, Manes.01G157500, Manes.03G096600, Manes.02G116900 and Manes.05G128600), *Oryza sativa* (LOC\_Os09g31970, LOC\_Os08g40180 and LOC\_Os02g48330), *Prunus persica* (Prupe.7G187000, Prupe.7G187500 and Prupe.8G182300), *Theobroma cacao* (Thecc1EG000025, Thecc1EG007601 and Thecc1EG034814), and *Zea mays* (GRMZM2G393337, GRMZM2G058095, GRMZM2G136465, GRMZM2G001645 and GRMZM2G043503).

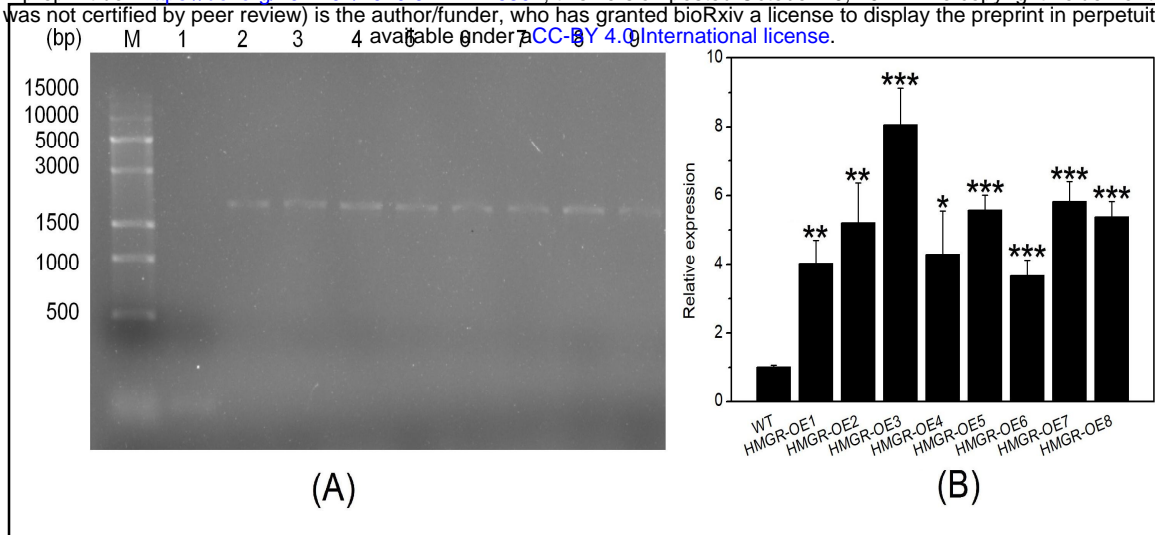

**Supplemental Figure 3 | Molecular identification of *PtHMGR-OEs*.** (A) PCR identification of *PtHMGR* in *PtHMGR-OEs* and NT poplars. Lane M: 15K molecular mass marker (TransGen, China); lane 1: genomic DNA from WT as a negative control; lanes 2–9: genomic DNAs from *PtHMGR-OE* lines. (B) qRT-PCR identification of the transcript levels of *PtHMGR* in *PtHMGR-OEs* and NT poplars. Three independent experiments were performed; Stars reveal significant differences, \*  $P < 0.05$ , \*\*  $P < 0.01$ , \*\*\*  $P < 0.001$ .



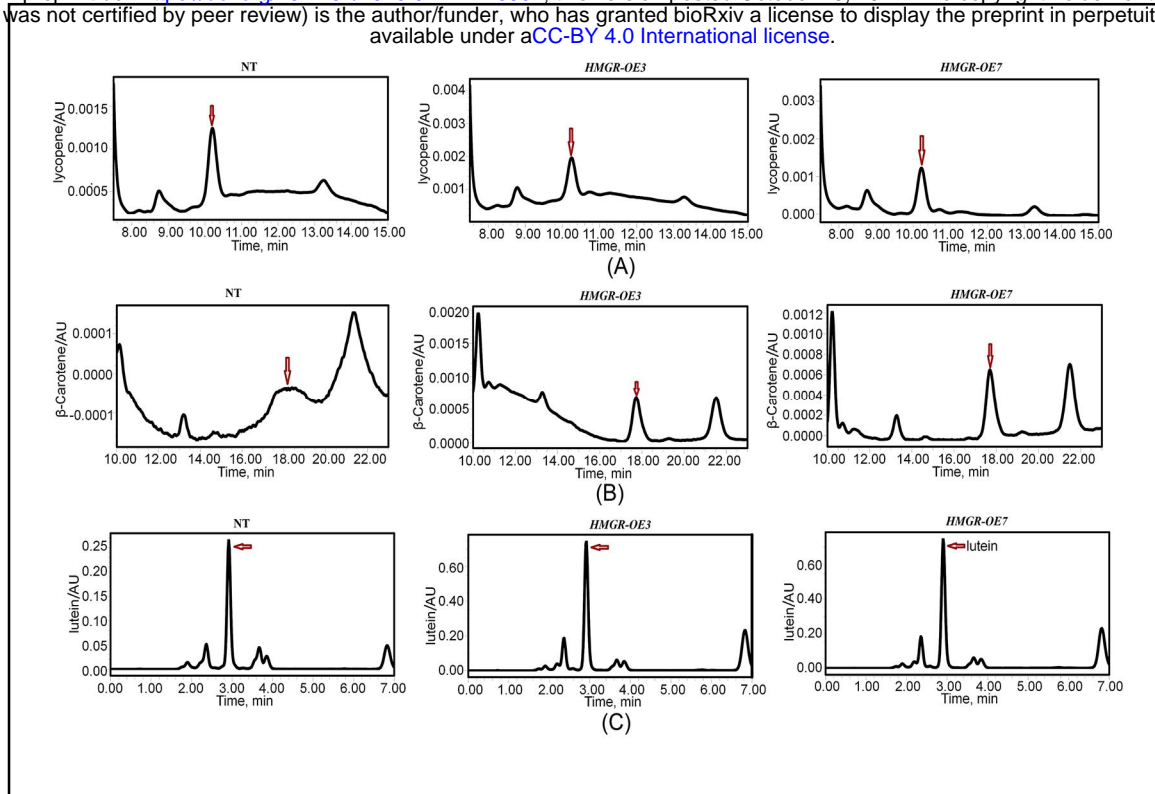

**Supplemental Figure 4** | HPLC chromatograms of analyzing the contents of (A)  $\beta$ -carotene, (B) lycopene, and (C) lutein in NT poplars and *PtHMGR-OEs*.

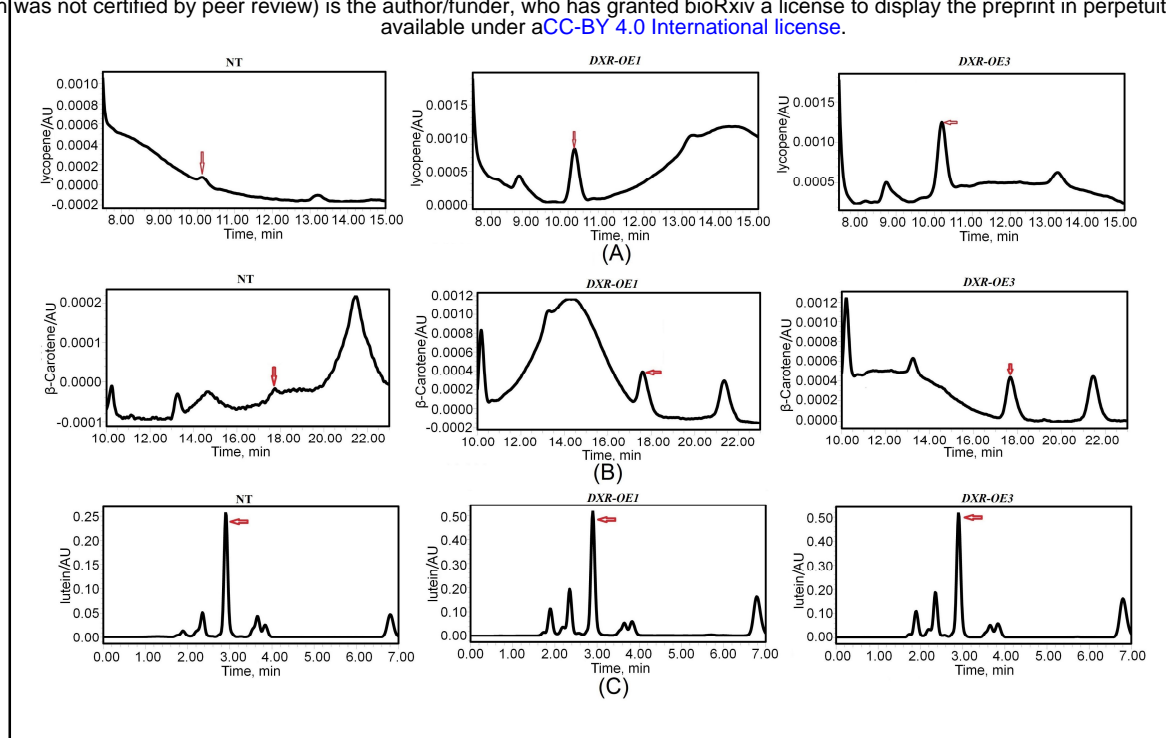

**Supplemental Figure 5** | HPLC chromatograms of analyzing the contents of (A)  $\beta$ -carotene, (B) lycopene, and (C) lutein in NT poplars and *PtDXR-OEs*.

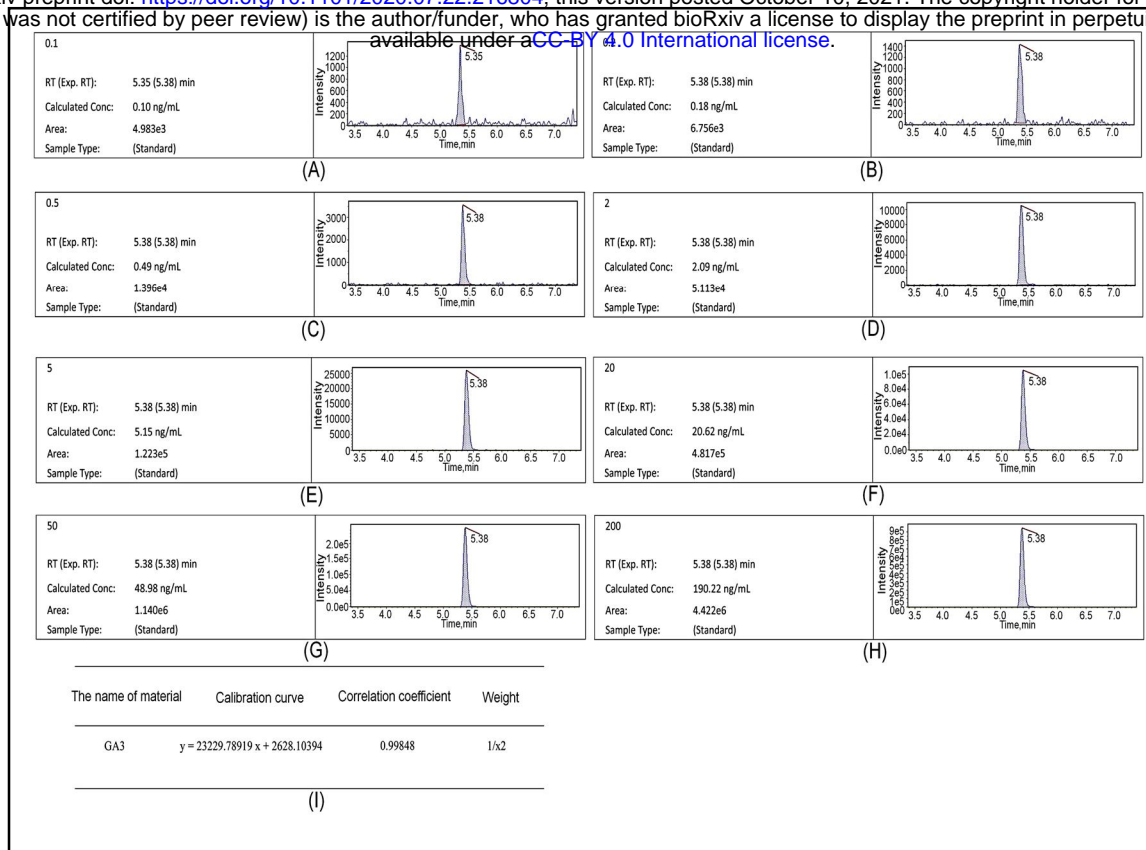

**Supplemental Figure 6 | Chromatogram analyses of GA3 standards via HPLC-MS/MS.** The chromatogram of standard GA3 at (A) 0.1, (B) 0.2, (C) 0.5, (D) 2, (E) 5, (F) 20, (G) 50, and (H) 200 ng/mL concentrations. (I) Equations for the GA3 standard curves.

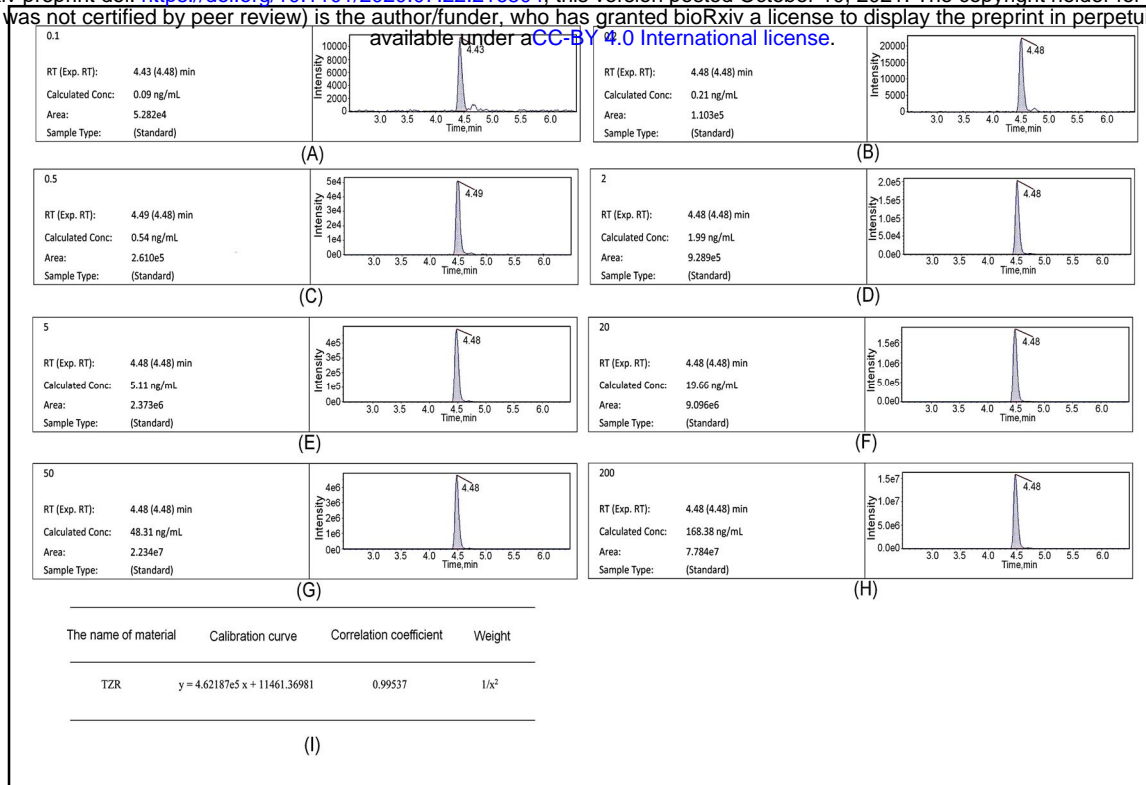

**Supplemental Figure 7 | Chromatogram analyses of tZR standards via HPLC-MS/MS.** The chromatogram of standard tZR at (A) 0.1, (B) 0.2, (C) 0.5, (D) 2, (E) 5, (F) 20, (G) 50, and (H) 200 ng/mL concentrations. (I) Equations for the TZR standard curves.



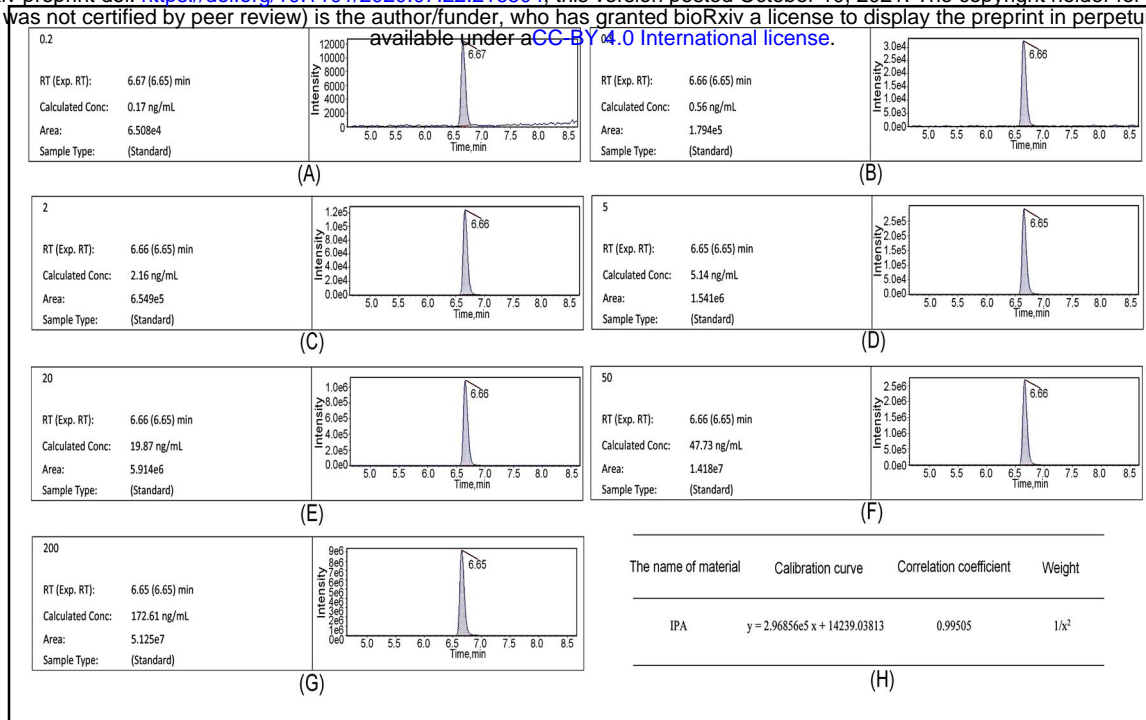

**Supplemental Figure 8 | Chromatogram analyses of IPA standards via HPLC-MS/MS.** The chromatogram of standard IPA at (A) 0.2, (B) 0.5, (C) 2, (D) 5, (E) 20, (F) 50, and (G) 200 ng/mL concentrations. (H) Equations for the IPA standard curves.

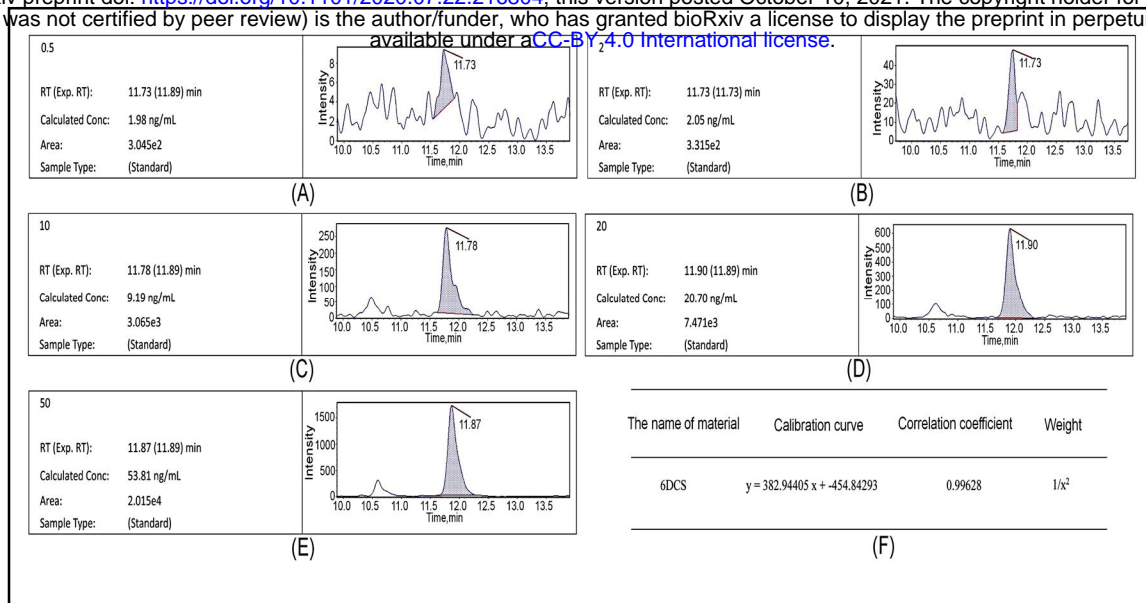

**Supplemental Figure 9 | Chromatogram analyses of DCS standards via HPLC-MS/MS.** The chromatogram of standard DCS at (A) 0.5, (B) 2, (C) 10, (D) 20, and (E) 50 ng/mL concentrations. (F) Equations for the DCS standard curves.

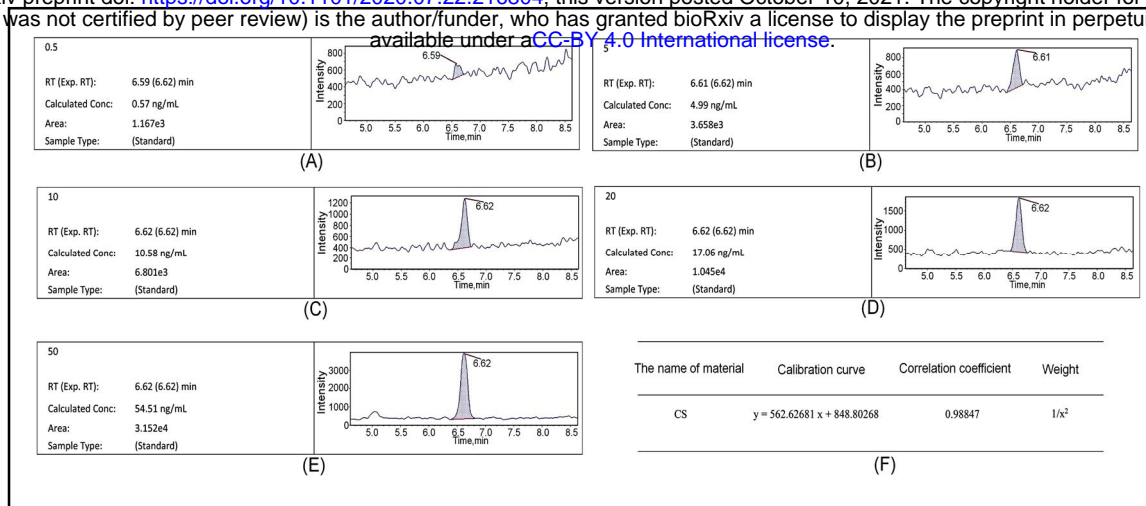

**Supplemental Figure 10 | Chromatogram analyses of CS standards via HPLC-MS/MS.** The chromatogram of standard CS at (A) 0.5, (B) 5, (C) 10, (D) 20, and (E) 50 ng/mL concentrations. (F) Equations for the CS standard curves.
